# Cortical multi-area model with joint excitatory-inhibitory clusters accounts for spiking statistics, inter-area propagation, and variability dynamics

Jari Pronold<sup>1,2</sup>, Aitor Morales-Gregorio<sup>1</sup>, Vahid Rostami<sup>3</sup>, Sacha J. van Albada<sup>1,3,\*</sup>

<sup>1</sup> Institute for Advanced Simulation (IAS-6) and JARA Institute Brain Structure-Function Relationships (INM-10), Jülich Research Centre, Jülich, Germany. <sup>2</sup> RWTH Aachen University, Aachen, Germany. <sup>3</sup> Institute of Zoology, University of Cologne, Cologne, Germany.

\* Corresponding author: [s.van.albada@fz-juelich.de](mailto:s.van.albada@fz-juelich.de)

## Abstract

The primate brain uses billions of interacting neurons to produce macroscopic dynamics and behavior, but current methods only allow neuroscientists to investigate a subset of the neural activity. Computational modeling offers an alternative testbed for scientific hypotheses, by allowing full control of the system. Here, we test the hypothesis that local cortical circuits are organized into joint clusters of excitatory and inhibitory neurons by investigating the influence of this organizational principle on cortical resting-state spiking activity, inter-area propagation, and variability dynamics. The model represents all vision-related areas in one hemisphere of the macaque cortex with biologically realistic neuron densities and connectivities, expanding on a previous unclustered model of this system. Each area is represented by a square millimeter microcircuit including the full density of neurons and synapses, avoiding downscaling artifacts and testing cortical dynamics at the natural scale. We find that joint excitatory-inhibitory clustering normalizes spiking activity statistics in terms of firing rate distributions and inter-spike interval variability. A comparison with data from cortical areas V1, V4, FEF, 7a, and DP shows that the clustering enables the resting-state activity of especially higher cortical areas to be better captured. In addition, we find that the clustering supports signal propagation across all areas in both feedforward and feedback directions with reasonable latencies. Finally, we also show that localized stimulation of the clustered model quenches the variability of neural activity, in agreement with experimental observations. We conclude that joint clustering of excitatory and inhibitory neurons is a likely organizational principle of local cortical circuits, supporting resting-state spiking activity statistics, inter-area propagation, and variability dynamics.

Keywords: spiking neural networks, cerebral cortex, clustered connectivity, simulations, signal propagation, spiking statistics, high-performance computing, macaque

## Introduction

1 Most studies in computational neuroscience focus on either the local or global circuitry while neglecting the  
2 interactions across scales. Recent studies bridge these scales by combining local and global circuits into multi-scale  
3 models enabling cortical simulations at neuronal and synaptic resolution (Schmidt et al., 2018a,b). This approach  
4 raises new questions compared to the study of isolated local circuits, for example: How can a hierarchically  
5 organized spiking neural network with realistic activity statistics support reliable signal propagation across areas?  
6 Reliable signal propagation is considered to be one of the four key properties of a candidate neural code (Perkel  
7 and Bullock, 1968; Kumar et al., 2010). Most previous studies have made simplifications, such as considering  
8 only strictly feedforward networks, assuming all areas to be identical, and not using biological data to constrain  
9 cortical connectivity (Diesmann et al., 1999; Deco and Rolls, 2005; Kumar et al., 2008, 2010). These studies  
10 identified a major common issue: modeled signals tend to either die out or amplify. Topographic connectivity has  
11 been shown to be crucial for signal propagation in spiking neural networks (Zajzon et al., 2019). A recent study

12 achieved signal propagation in data-driven large-scale models with simplified local connectivity (Joglekar et al.,  
13 2018), in both population rate models and connected balanced spiking neural networks, albeit without realistic  
14 spiking statistics. Here, we present a large-scale model at single-neuron resolution with clustered connectivity,  
15 that is able to transmit signals across the cortical hierarchy while preserving biologically realistic dynamics. To  
16 avoid otherwise inevitable downscaling artifacts (van Albada et al., 2015), we include the full biological density of  
17 neurons and synapses in each local circuit, yielding a model with about 4 million neurons and 24 billion synapses.  
18 Although much is known about cortico-cortical and local connections, the structural connectivity is not fully  
19 characterized. Structural relations and statistical regularities can be used to fill the gaps in the anatomical data  
20 (Schmidt et al., 2018a; van Albada et al., 2022). The population-level connectivity matrix for the vision-related  
21 areas of macaque cortex derived from anatomical data by Schmidt et al. (2018a) was found to produce unrealistic  
22 activity when simulated with random connectivity below the population level. The predicted connectivity matrix  
23 spans six orders of magnitude and has a relatively high uncertainty. Small changes to the connectivity can  
24 increase global stability (Schuecker et al., 2017) by uncovering cortical loops critical to global stability, such as  
25 that between areas the frontal eye field and dorsolateral prefrontal cortex, ultimately leading to a stable network  
26 (Schmidt et al., 2018b). These neuron-level networks are difficult to control due to their size and complexity.  
27 Thus, reliably transmitting signals across areas without destabilizing the network is challenging.  
28 To overcome the limitations of random networks and ensure signal transmission, several studies use clustered  
29 networks (Amit and Brunel, 1997; Deco and Rolls, 2005; Litwin-Kumar and Doiron, 2012; Mazzucato et al., 2015;  
30 Rost et al., 2018; Rostami et al., 2022). Clustered networks involve some form of strengthened connections within  
31 clusters and weakened connections across clusters. Deco and Rolls (2005) studied attention using a network  
32 of spiking neurons spanning two areas and featuring different clusters of excitatory neurons within the areas.  
33 Clustered networks tend to have multiple attractors. Thus, models with clusters of excitatory neurons have been  
34 used to explain decision-related activity (Amit and Brunel, 1997; Litwin-Kumar and Doiron, 2012; Mazzucato  
35 et al., 2015). Jointly clustering excitatory and inhibitory populations can be used to robustly build winnerless  
36 competition into balanced random networks while reproducing biological firing rates, spiking irregularity, and  
37 trial-to-trial spike count variability from in vivo recordings (Rost et al., 2018; Rostami et al., 2022). Furthermore,  
38 excitatory-inhibitory (EI) clustering can generate robust multistability with local balance for a wider range of  
39 network sizes and parameters than purely excitatory (E) clustering (Schaub et al., 2015; Rost et al., 2018; Najafi  
40 et al., 2020; Rostami et al., 2022).  
41 Ample evidence exists that synaptic connections between excitatory neurons are clustered and not uniform (Song  
42 et al., 2005; Perin et al., 2011). For example, Song et al. (2005) found that, in the visual system, bidirectional  
43 and clustered three-neuron connection motifs occur significantly more often than in a random graph based on a  
44 pairwise connection probability alone. Furthermore, such clusters receive similar visual feedforward input and  
45 thus could form fine-scale functional groups (Yoshimura et al., 2005; Ko et al., 2011). Clusters can be identified  
46 in the neocortex as ensembles of highly active, interconnected cells and might encode sensory information by  
47 high firing rates (Yassin et al., 2010). More recent anatomical and physiological findings suggest that inhibitory  
48 neurons and their connectivity also have a high degree of specificity (Xue et al., 2014; Lee et al., 2014; Morishima  
49 et al., 2017; Arkhipov et al., 2018; Khan et al., 2018; Znamenskiy et al., 2018; Shin et al., 2019; Najafi et al., 2020).  
50 For instance, in reciprocally connected pairs of inhibitory and excitatory neurons in the mouse visual cortex there  
51 is a positive correlation between the strength of the excitatory and the inhibitory synapses (Znamenskiy et al.,  
52 2024). These studies suggest that the networks can form strong local interconnected clusters consisting of both  
53 excitatory and inhibitory cells. All in all, clustered connectivity is a common feature of the brain that can be  
54 computationally advantageous, but its effects on large-scale dynamics remain to be elucidated.  
55 In this work, we introduce a clustered connectivity scheme (Fig. 1) in a biologically constrained model of macaque  
56 cortex (Schmidt et al., 2018a,b). We validate our clustered model by comparing its simulated activity with the  
57 previous unclustered version of the model, as well as with resting-state spiking activity across several cortical  
58 areas (V1, V4, FEF, 7a, and DP). We find that the clustered model supports plausible activity statistics in

59 terms of firing rate distributions and inter-spike interval variability. We show that the clustered connectivity  
60 scheme improves upon the original model particularly in terms of the activity statistics of the higher cortical  
61 areas FEF, 7a, and DP. Most importantly, we find that the clustered model can transmit signals across all areas  
62 in both feedforward and feedback directions. Upon stimulation of V1, the activity propagates through the entire  
63 model with plausible response latencies. Finally, we also show that the stimulation of the model quenches the  
64 variability of neural activity, in agreement with experimental observations. All in all, we show how joint clustering  
65 of excitatory and inhibitory neurons can support plausible resting-state spiking activity statistics, inter-area  
66 signal propagation, and variability dynamics upon stimulation in a multi-area cortical network. The model can  
67 function as a testbed for further studies of cortical spiking dynamics requiring inter-areal signal propagation.

## 68 Results

### 69 A clustered multi-area model of the macaque cortex

70 To study the effect of network clustering in macaque cortex we use a previously developed multi-area model of  
71 the vision-related areas (Schuecker et al., 2017; Schmidt et al., 2018a,b), see Methods for a detailed account of  
72 the model construction. In short, the multi-area model is a multi-scale spiking network model of all vision-related  
73 areas in one hemisphere of macaque cortex with neuronal and synaptic resolution. It integrates experimental  
74 data on cortical architecture and connectivity into a comprehensive network and relates cortical connectivity to  
75 its dynamics. The local circuitry features four cortical layers and uses the microcircuit of Potjans and Diesmann  
76 (2014) as a blueprint. The cortico-cortical connectivity is based on axonal tracing data (Bakker et al., 2012),  
77 including quantitative and layer-specific retrograde tracing data (Markov et al., 2014b,a). We extend this model  
78 by subdividing every area into  $Q$  clusters. Both inside and across areas, synapses within clusters are strengthened,  
79 and synapses between different clusters are weakened. Fig. 1 schematically shows the network construction for  
80  $Q = 2$ .

### 81 Unrealistic aspects of the dynamics of the original multi-area model

82 As a baseline for comparison, we first simulated the spiking activity of the original unclustered model (Schmidt  
83 et al., 2018a,b). Fig. 2A shows raster plots for areas V1, V2, V4, 7a, DP, and FEF when the model is in the  
84 metastable state (see Methods). V1, V2, and FEF show largely asynchronous irregular activity, while the vertical  
85 stripes for V4, 7a, and DP indicate high synchrony. Neurons in areas 7a and DP fire at a high rate, especially in  
86 layers 4 and 5 of area 7a.

87 Fig. 2B shows the distribution of firing rates for selected areas. Area MIP shows an unrealistic firing peak at  
88 around 300 spikes/s. Areas DP, MT, LIP, and 7a show a high density of firing rates well above 100 spikes/s. The  
89 other areas fire at more reasonable rates. The raster plots of 7a and DP in Fig. 2A suggest that population 5E  
90 spikes excessively while population 6E stays completely silent.

91 To assess targeted signal propagation between areas, we stimulate V1 and observe the resulting firing rates in V2  
92 in Fig. 2C. The stimulation is a brief pulse of 200 ms with a rate of 30 spikes/s. We recorded the instantaneous  
93 firing rate from V1 and V2 with a bin size of 1 ms and convolved it with a Gaussian kernel of 10 ms width. The  
94 stimulation was repeated every second, providing 100 stimulation trials. Fig. 2C shows the mean (solid line) and  
95 standard deviation (shading) across trials. No detectable signal arrives in area V2 in response to the V1 stimulus,  
96 even though most of the cortico-cortical connections to V2 originate from V1. The large standard deviation in  
97 the firing rates of area V1 indicates that the same stimulus can have vastly different effects on the dynamics of  
98 V1. As shown in Schmidt et al. 2018b, signals do propagate through the network spontaneously, but it appears  
99 difficult to control their directions and strengths.

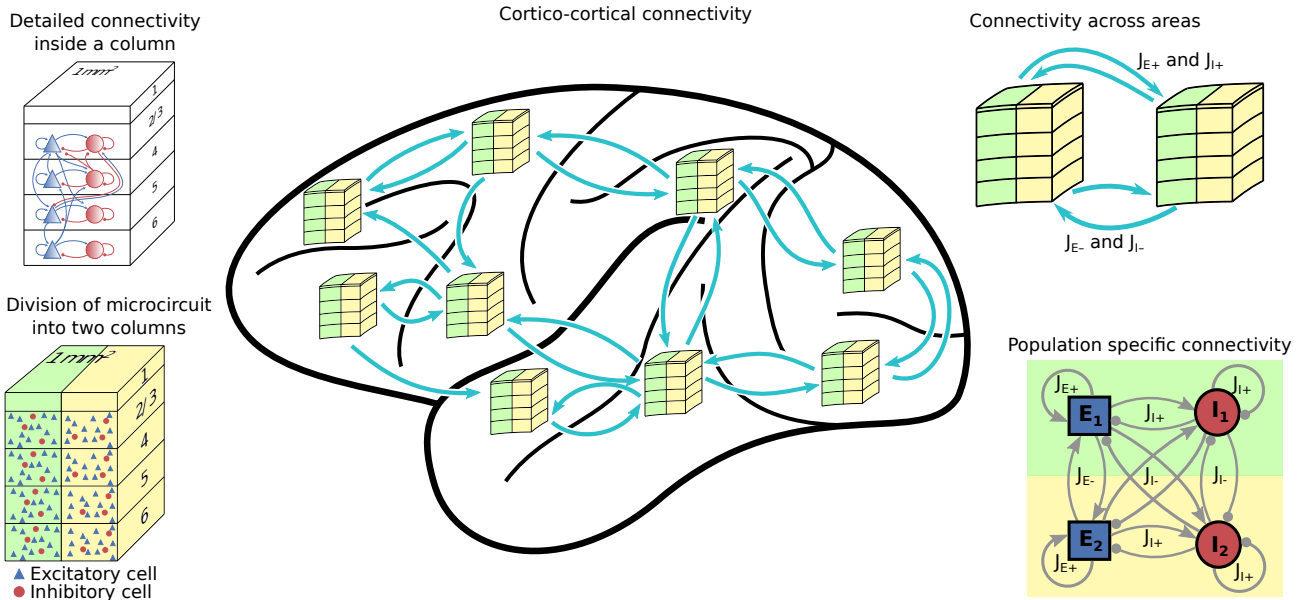

Figure 1: **Overview of the model.** The basic building block of the areas of the model is the microcircuit and its intricate connectivity (Potjans and Diesmann, 2014). All areas are split into  $Q$  clusters of equal size (here,  $Q = 2$  is shown). Every column in every area has a counterpart in every other area. The synaptic weights are scaled inside and across columns, both locally and across areas. The scaling depends on whether the same or different columns connect with each other. If the connection is established within the same (or, for inter-area connections, corresponding) cluster, the weights are strengthened with the factors  $J_{E+}$  and  $J_{I+}$ . Otherwise the connections are weakened by the factors  $J_{E-}$  and  $J_{I-}$ . This is illustrated on the bottom right with a two-population network for simplicity.

## 100 Clustering supports realistic spiking dynamics and signal propagation

101 To address the lack of signal propagation in the original multi-area model, we introduce a connectivity structure  
 102 that clusters areas into columns and alters the synaptic weights. The altered synaptic weights emphasize  
 103 connections between the same columns and weaken all other connections (see Methods [Clustered multi-area](#)  
 104 [model of macaque visual cortex](#)). We simulated a clustered model with  $Q = 50$  clusters. [Fig. 3A](#) shows raster  
 105 plots for V1, V2, V4, 7a, DP, and FEF in the condition without transient stimulation, mimicking the resting state.  
 106 The overall firing behavior has considerably changed with respect to the original unclustered model: In every  
 107 area, some clusters are more active than others, displaying activity akin to up states. Especially in FEF, there  
 108 is frequent switching between active clusters. Furthermore, the vertical stripes are gone, and spiking activity  
 109 in areas 7a and DP is much more plausible. [Fig. 3B](#) shows the distribution of firing rates for selected cortical  
 110 areas. All areas have a comparable firing rate distribution, and no area spikes excessively, in agreement with  
 111 experimentally measured activity levels (Shinomoto et al., 2003, 2009; Morales-Gregorio et al., 2020).

112 In order to study signal propagation, we provided a stimulation of 200 ms with a rate of 30 spikes/s to a given  
 113 cluster in V1, repeated every second. [Fig. 3C](#) shows the propagation of the signal from V1 to the corresponding  
 114 cluster in V2. A clearly detectable signal arrives in V2 briefly after V1 stimulation. The standard deviation of  
 115 firing rates in areas V1 and V2 is smaller than in the original model (see [Fig. 2C](#)), indicating that the same  
 116 stimulus has a more predictable effect on the firing rates. The gray line in [Fig. 3C](#) shows the firing rate of all  
 117 other clusters in V1. Thus, the firing rates in the non-stimulated clusters remain low and are slightly suppressed  
 118 during stimulation.

119 We have thus shown that the clustered model has more realistic spiking activity with a consistent firing rate  
 120 distribution across areas and can reliably propagate a stimulus from V1 to V2.

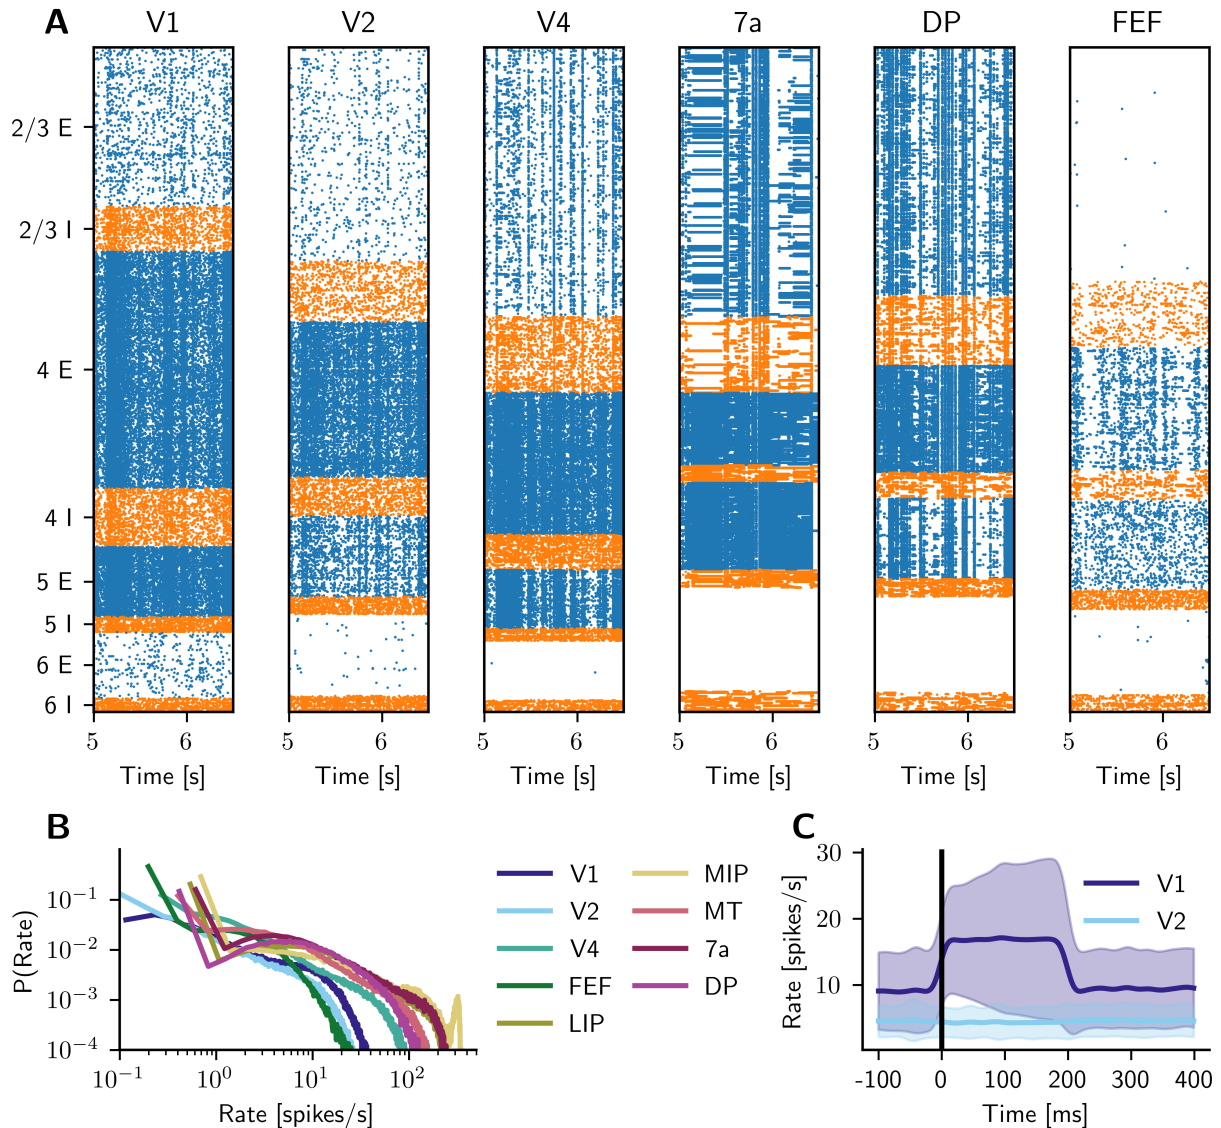

Figure 2: **Dynamics of the original model.** (A) Raster plot of spiking activity of 2% of the neurons in areas V1, V2, V4, 7a, DP, and FEF during resting state. Blue: excitatory neurons, orange: inhibitory neurons. (B) Distribution of spike rates across all layers and populations for several cortical areas. (C) Propagation of a stimulation of 200 ms of 30 spikes/s from area V1 to V2. The firing rates are averaged over 100 trials and convolved with a Gaussian kernel with a width of 10 ms. Standard deviation ( $\pm$ ) at each time point is indicated by the shaded regions.

## 121 Comparison of single-neuron spiking statistics with experimental recordings

122 We compare the simulated data from the original model and the clustered model with new spiking neuron data  
 123 (see methods [Experimental data](#)). The experimental data consist of recordings from V1 layers 5/6, V4 layers 2/3  
 124 and 5/6, FEF layers 2/3, 7a layers 5/6 and DP layers 5/6. [Fig. 4](#) compares the distributions of the coefficient  
 125 of variation of the inter-spike intervals (CV ISI), the revised local variation (LvR; [Shinomoto et al., 2009](#)), and  
 126 firing rate in all areas. In 7a and DP, the two experimental lines correspond to different recording sessions. To  
 127 match the number of neurons from the experimental data, we randomly sample the same number of spike trains  
 128 from the simulated data ( $N = 100$  realizations) and plot the mean (lines) and standard deviation (shadings).  
 129 The clustered model ( $Q = 50$ ) matches the experimental data better than the original model for all data sets  
 130 except V4 L2/3. It especially outperforms the original model for V4 L5/6, 7a, and DP. The CV ISI distribution  
 131 in 7a of the original model (shown as an inset) is centered around unrealistically high values. In DP, the original

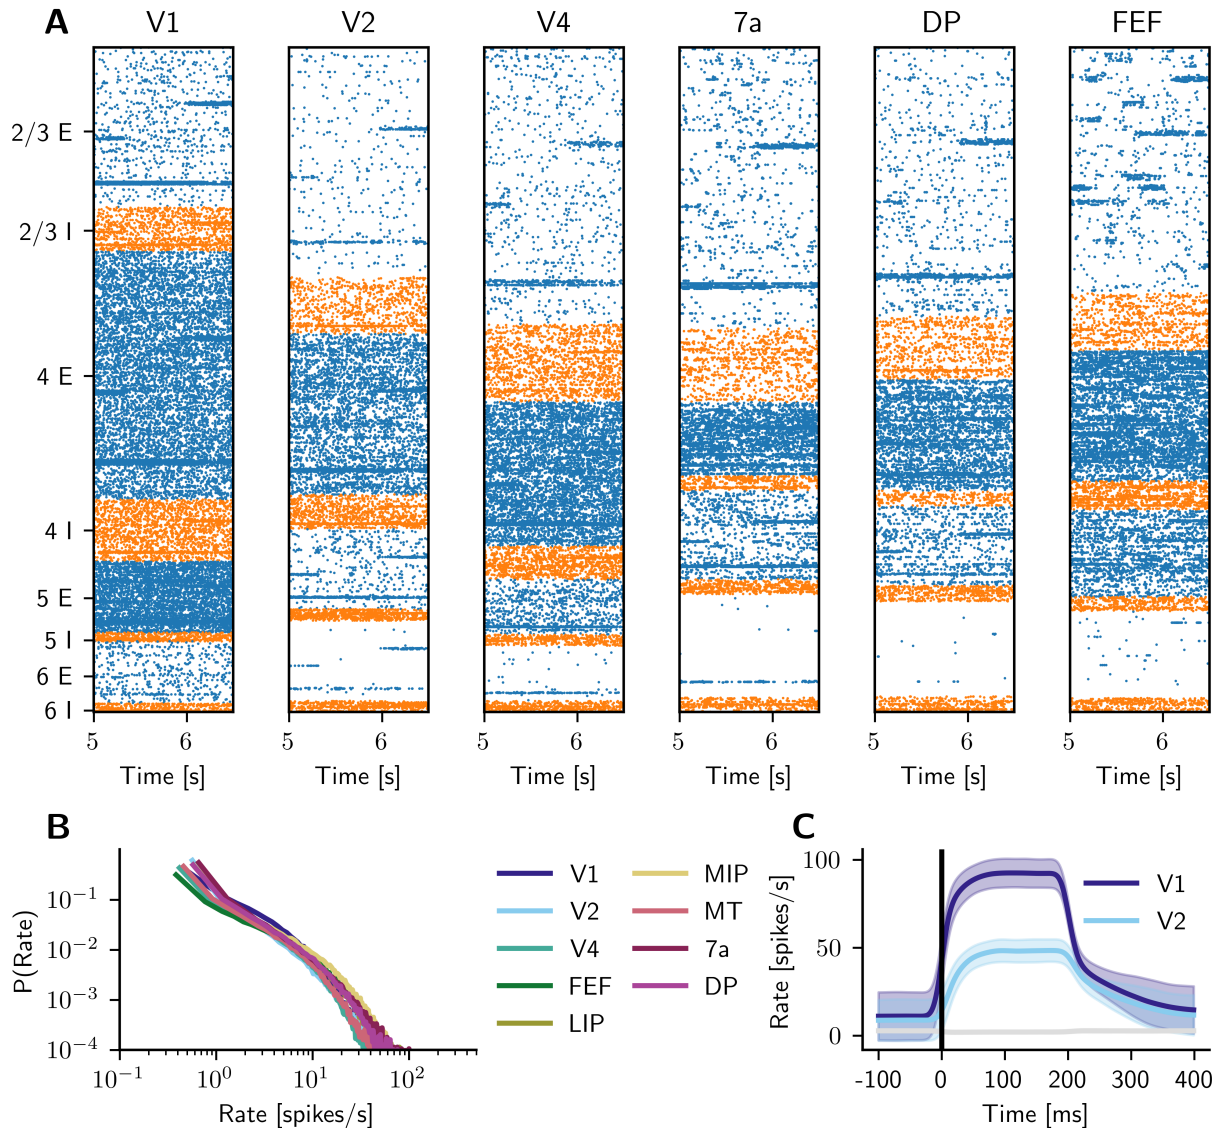

**Figure 3: Dynamics of the clustered model.** (A) Raster plot of spiking activity of 2% of the neurons in areas V1, V2, V4, 7a, DP, and FEF during the simulated resting state. Neurons are ordered according to their cluster membership. Blue: excitatory neurons, orange: inhibitory neurons. (B) Distribution of spike rates across all layers and populations for several cortical areas. (C) Propagation of a stimulation of 200 ms of 30 spikes/s from the stimulated cluster in area V1 to the corresponding cluster in V2. The firing rates are averaged over 100 trials and convolved with a Gaussian kernel with a width of 10 ms. Standard deviation ( $\pm$ ) at each time point is indicated by the shaded regions. The gray line shows the firing rate of all non-stimulated clusters in area V1.

132 CV ISI distribution is also shifted to the right, but not as strongly. The distributions of all three measures, CV  
 133 ISI, LvR, and firing rate, match the experimental data better in the clustered than in the original model. In the  
 134 lower panel, we show the Kolmogorov-Smirnov distance between the experimental and simulated distributions for  
 135 the CV ISI, LvR, and firing rate for different numbers of clusters  $Q$ . In the case of the CV ISI distribution, V1,  
 136 7a, and DP profit from clustering, while V4 and FEF initially worsen a little bit but recover at  $Q = 50$ . In the  
 137 case of the CV ISI distribution, V1, 7a, and DP profit from clustering, while V4 and FEF initially worsen slightly  
 138 but recover at  $Q = 50$ . For the LvR distribution, most areas appear unaffected by clustering, while 7a and DP  
 139 profit from clustering, and V4 worsens. The agreement of the rate distribution does not change much with  $Q$ ;  
 140 only the V4 agreement declines.

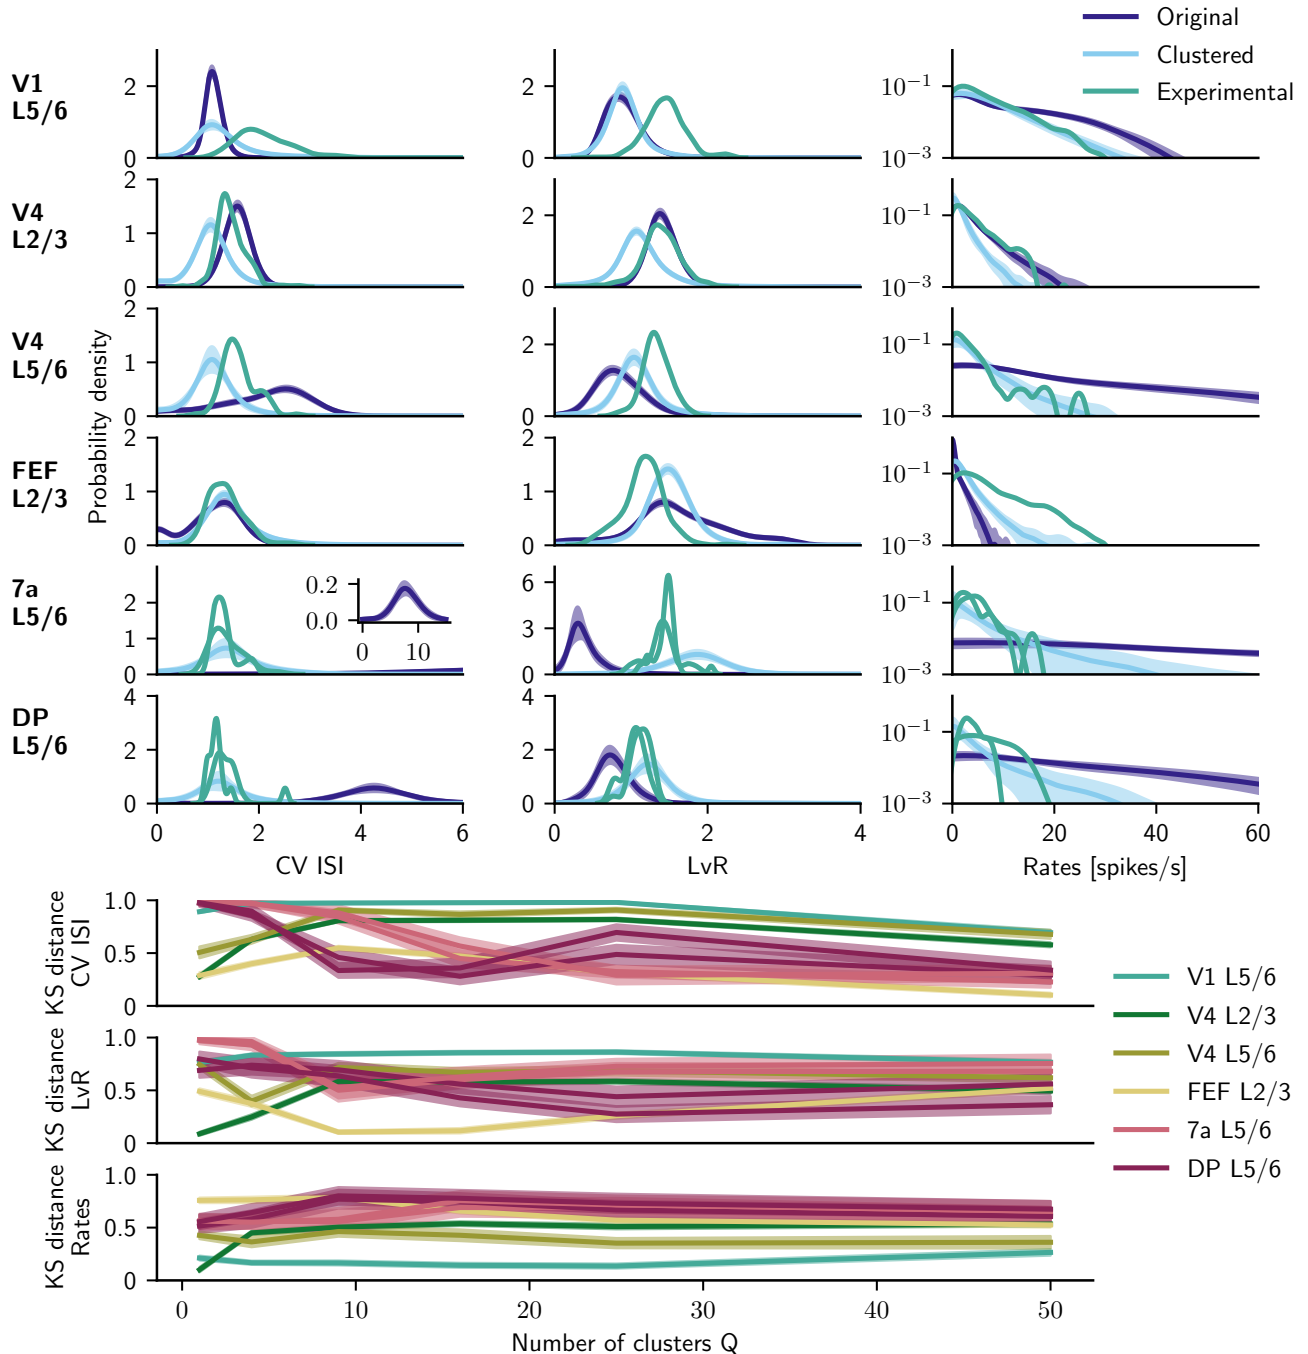

Figure 4: **Comparison of single-neuron spiking statistics from clustered model with experimental recordings.** Upper panel: Probability densities of CV ISI, LvR, and rate distributions for area V1 layers 5 and 6, area V4 layers 2 and 3, area V4 layers 5 and 6, area FEF layers 2 and 3, 7a layers 5 and 6, and DP layers 5 and 6. The experimental data in 7a and DP contain two measurements from two independent recording sessions. The clustered model uses  $Q = 50$  clusters. Inset in 7a, layer 5/6 shows the CV ISI of the original model. Lower panel: Kolmogorov-Smirnov distance of the CV ISI, LvR, and rate distribution comparing experimental and simulated data for different numbers of clusters  $Q$ . The left data point at  $Q = 1$  equals the original, metastable model of Schmidt et al. (2018b).

#### 141 Network-wide signal propagation in feedforward and feedback directions

142 We simulate the response of the clustered model to a pulse of 200 ms and 30 spikes/s applied either to one cluster  
 143 in primary visual cortex (area V1) or to one cluster in the frontal eye field (FEF). Fig. 5 shows the firing rates in  
 144 the stimulated cluster for feedforward and feedback propagation. Areas are sorted according to their distance to

145 the stimulated area, measured as the shortest possible path between the areas without crossing the cortical surface  
146 (Bojak et al., 2011). The coloring of the area names corresponds to different modules of the network determined  
147 using the map equation method (Rosvall et al., 2009) applied to the structural connectivity as described in  
148 Schmidt et al. (2018b). The firing rates are averaged over 100 trials and convolved with a Gaussian kernel with a  
149 width of 10 ms.

150 The response to V1 stimulation propagates through the network in the feedforward direction from lower to higher  
151 areas in the visual hierarchy. Early visual areas (i.e., those close to the sensory periphery) and dorsal stream  
152 areas become active first. Ventral stream and polysensory areas follow these, and the frontal areas are the last to  
153 respond. The activation timing coincides well with the sorting according to the shortest paths.

154 In contrast, the response to FEF stimulation propagates in the feedback direction. In this experiment, frontal  
155 areas become active first, followed by polysensory, ventral stream, and dorsal stream areas. Finally, early visual  
156 areas respond. We can also observe a relation between distance to the stimulated area and response time, although  
157 weaker than in the feedforward case.

158 In both cases, farther areas respond later to the stimulus and have, in general, a weaker time-integrated response.  
159 All areas in the model show a response to both the feedforward and feedback stimulus, with the notable exception  
160 of MDP, which has no incoming connections in the model (from the areas included in it) and is therefore not  
161 shown in Fig. 5. In summary, the clustered connectivity enables signal propagation throughout the cortex.

## 162 **Response latencies in the clustered model**

163 To quantify the speed and effectiveness of the signal propagation, we measured the response latencies in the  
164 clustered model. We first used the Poisson surprise algorithm to detect which neuronal responses occurred due to  
165 the stimulus and not just by random chance (see methods [Response latency measurement via Poisson surprise](#)).  
166 In Fig. 6A–D, we show the instantaneous firing rate of all nonrandom neuron responses in four areas (V1, V2, V4,  
167 and FEF) and the spike train raster plot of a single sample neuron across trials. Both the firing rate and the  
168 raster plot show high activity during the stimulation that decays after the stimulus is removed. The firing rate  
169 shows that neurons in V1 respond quickly to the stimulus, whereas in the other areas, the maximum firing rate is  
170 reached after a small delay, as also shown in Fig. 5. For all neurons, we measured the time to the first nonrandom  
171 spike—the time between stimulus onset and the first nonrandom spike in the corresponding cluster—and depict  
172 its cumulative distribution in Fig. 6E. Fig. 6F shows the response latencies, defined as the time point when half  
173 of the neurons have become active, compared against experimental data (Schmolesky et al., 1998; Barash et al.,  
174 1991; Bushnell et al., 1981; Chafee and Goldman-Rakic, 1998; Robinson et al., 1978; Lamme and Roelfsema,  
175 2000). In the experimental data, the timings are reported from the moment a stimulation was presented to the  
176 monkey, whereas in the simulation, we directly stimulate V1. Thus, to have the same frame of reference, we  
177 subtracted the experimentally measured latency of V1 from the experimental response latencies. Areas V2, V4,  
178 and TF have similar response latencies in our model and in the experimental data. Also, model areas AITd and  
179 AITv, both of which overlap with area TEa for which the latency was measured experimentally, on average have  
180 a latency comparable to TEa. The remaining areas have a longer response latency in our model than in the *in*  
181 *vivo* experiments.

## 182 **Quenched neural variability after stimulation**

183 The variability of neuronal activity across trials, measured as the Fano factor, has been shown to decrease after  
184 stimulus presentation (Churchland et al., 2010; Rostami et al., 2022). We use the original and clustered models to  
185 study whether stimulation reproduces the decrease in neuronal variability. Similarly to the previous simulations,  
186 a pulse of 30 spikes/s but now lasting 400 ms was applied 50 times every 2 seconds to one cluster in area V1, and  
187 we measured the resulting Fano factor (see Methods [Neural variability quantification across trials](#)). Fig. 7 depicts  
188 the mean-matched Fano factor (solid line) for areas V1, V4, LIP, and MT, along with the standard deviation



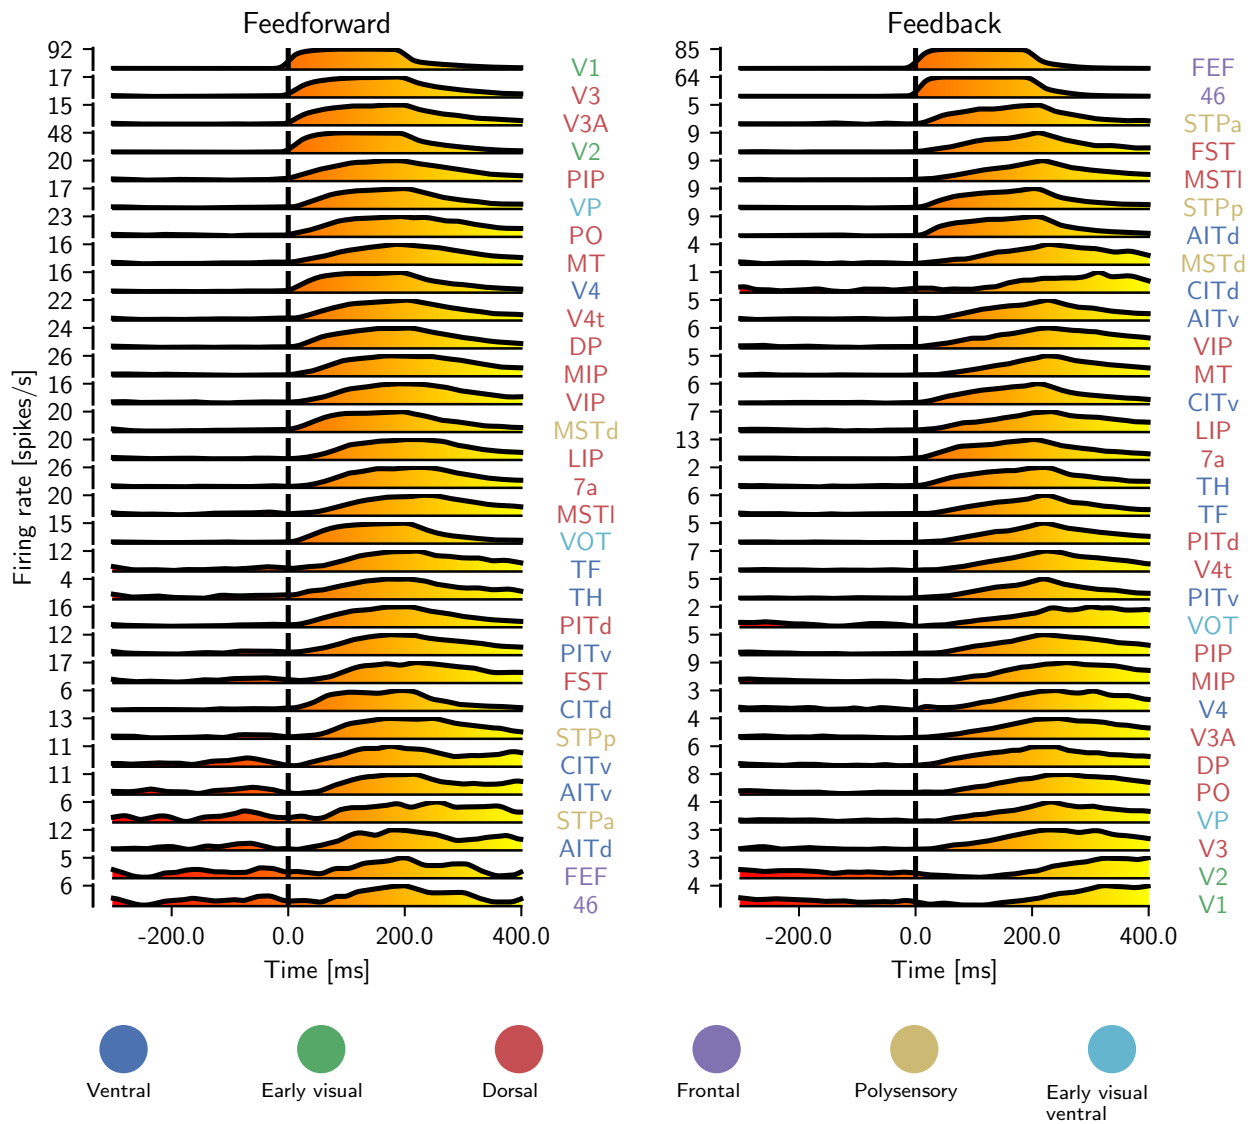

Figure 5: Clustered connectivity enables signal propagation across the entire network, in both the feedforward and feedback directions. A stimulation of 200 ms and 30 spikes/s was applied to one out of 50 clusters at time point 0 in area V1 in the feedforward case and in area FEF in the feedback case. The simulations consisted of 100 trials of 1 s duration each. The firing rates are convolved with a Gaussian kernel with a width of 10 ms. Areas are sorted according to shortest path lengths with respect to the stimulated area—either V1 or FEF. The color gradient under the curve represents time. Coloring of the area name labels corresponds to modules of the area-level network identified using the map equation method (Rosvall et al., 2009) as described in Schmidt et al. (2018b). Area MDP is not shown, as it does not have any incoming connections from the rest of the modeled network.

189 (shading). In the experimental data, the variability decays as soon as an input is presented, followed by a slow  
 190 increase and finally stabilizing at a slightly higher value towards the end of the stimulation period. In the original  
 191 model, the Fano factor of V1 rises sharply when the stimulation is applied. All other areas appear unaffected by  
 192 the stimulation, further demonstrating the lack of signal propagation. The Fano factor for these areas in the  
 193 original model is several times larger than the experimental observations, likely due to the strong fluctuations in  
 194 the simulated activity leading to a high variance across trials. In the clustered model, the stimulation decreases  
 195 the Fano factor for all areas, albeit not as sharply as in the experimental observations. The Fano factor drops  
 196 during the stimulation, and in V1 and V4, it reaches a low-value plateau, in contrast to the experimental data,  
 197 where the Fano factor increases shortly after reaching the minimum.

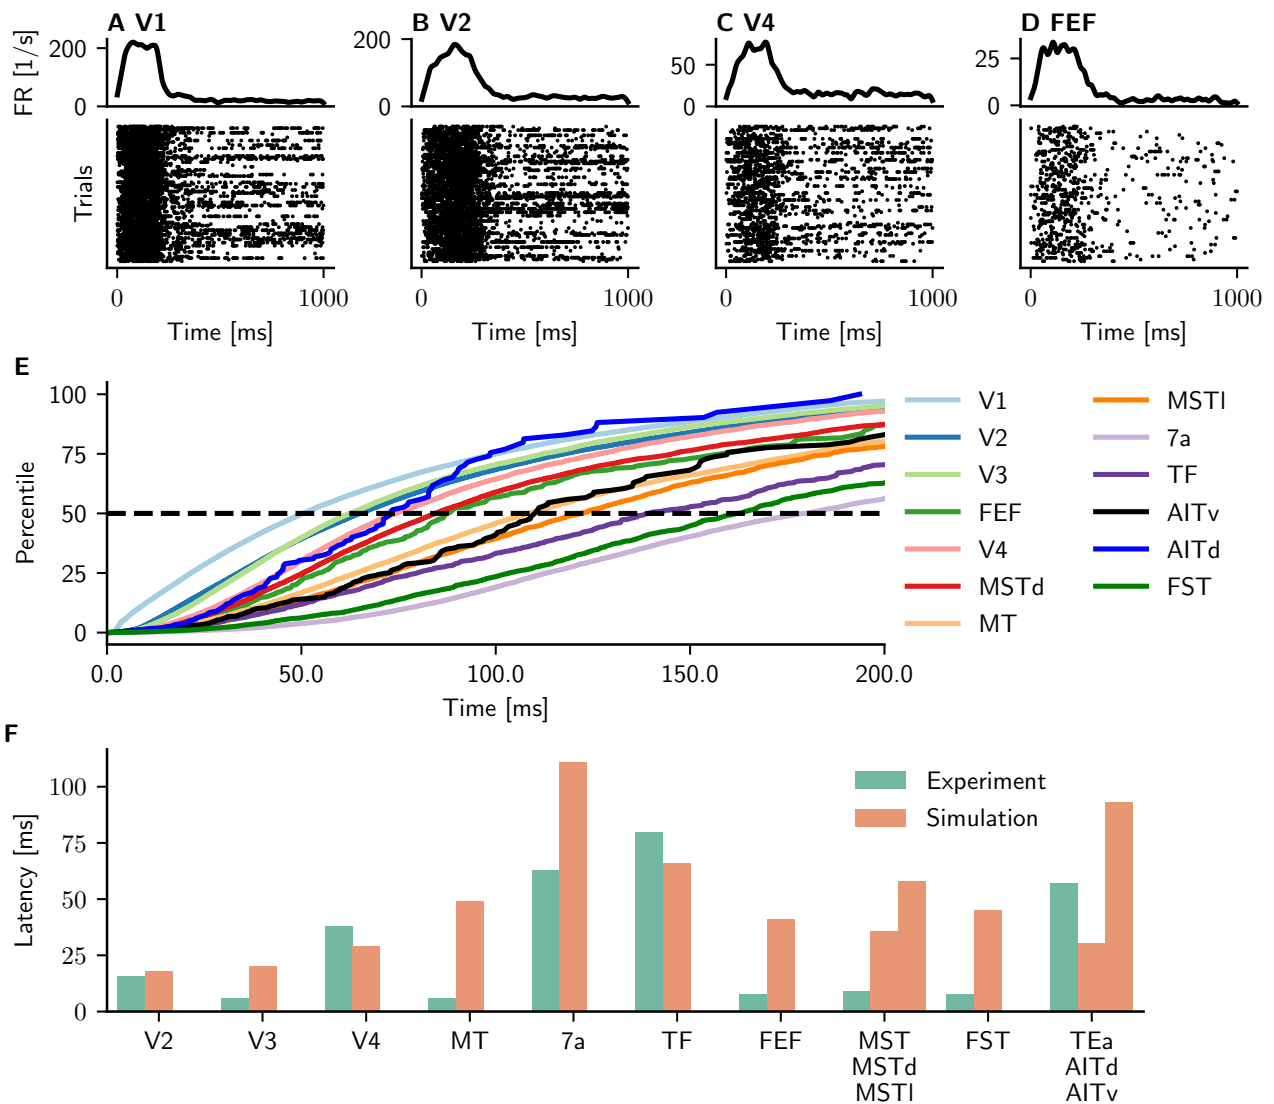

Figure 6: **Response latencies in the clustered model.** (A–D) Neuronal responses of single neurons after stimulation of V1. The shown responses are detected via the Poisson surprise method. Upper panels: Instantaneous firing rate (FR) of all detected neurons for areas V1, V2, V4, and FEF (convolved with a Gaussian kernel with a width of 10 ms). Lower panels: sample raster plot of a single neuron that exhibits a nonrandom response to the stimulus. (E) Cumulative distributions of the time to the first nonrandom spike for several cortical areas. The 50th percentile—the time at which half of all neurons within the corresponding cluster have responded to the stimulus—is considered the response latency for that area. (F) Comparison of response latencies in experiments (Schmolesky et al., 1998; Barash et al., 1991; Bushnell et al., 1981; Chafee and Goldman-Rakic, 1998; Robinson et al., 1978; Lamme and Roelfsema, 2000) and simulations. The latencies of modeled areas MSTd and MSTI are compared with measurements from area MST; those of modeled areas AITd and AITv are compared with measurements from TEa.

## 198 Discussion

199 On the example of a multi-scale model of one hemisphere of macaque visual cortex, we have shown that joint  
 200 clustering of excitatory and inhibitory neurons helps account for various aspects of cortical dynamics. First,  
 201 the statistics of ongoing spiking activity in several cortical areas are more realistic compared to an unclustered  
 202 version of the model (Schmidt et al., 2018a,b). Second, the clustering enables signals to reliably propagate across  
 203 areas, with response times upon V1 stimulation matching experimental data in several areas. Third, the clustered  
 204 model reproduces reductions in trial-to-trial variability upon stimulus presentation.

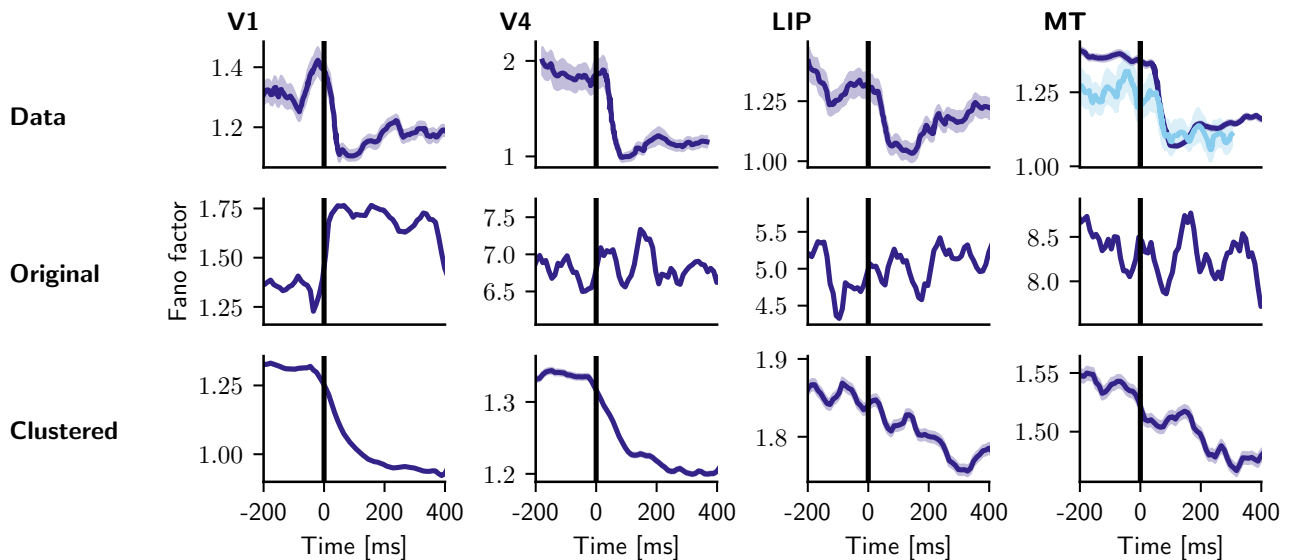

Figure 7: **Neural variability changes after stimulation.** The evolution of the Fano factor for areas V1, V4, LIP, and MT in experimental data (Churchland et al., 2010), the original model, and the clustered model. MT shows two experimental datasets. Simulated data: a pulse of 400 ms and 30 spikes/s was applied to one cluster in primary visual cortex (area V1). In all three panels, Fano factor (FF) is computed in a 50 ms sliding window sliding in steps of 10 ms. Shaded areas show the standard error of the mean.

205 In the original, unclustered model of Schmidt et al. (2018a,b), the simulated V1 spiking activity was compared  
206 with parallel spike train recordings from all layers of V1 in lightly anesthetized macaque (Chu et al., 2014b,a).  
207 For this area, our model with 50 clusters reproduces the distribution of the spiking irregularity quantified by the  
208 coefficient of variation of the inter-spike intervals (CV ISI) somewhat better than the original model (Fig. S1).  
209 However, the clustered model has a flatter power spectrum and lower power than both the experimental data and  
210 the original model, lacking the population bursts seen in the original model and having somewhat lower firing  
211 rates. A partial explanation for this may be that the clustered model is more representative of an awake state  
212 rather than an anesthetized state (Hayashi et al., 2014), since the anesthetic ketamine has been found to increase  
213 at least low-frequency and gamma power; although it was also found to decrease beta power (Akeju et al., 2016;  
214 Schroeder et al., 2016).

215 In the present study, we compared the spiking activity with data from V1, visual area V4, the frontal eye  
216 field (FEF), parietal area 7a, and dorsal prelunate cortex (area DP). Overall, the clustered model fits the  
217 experimental data better than the unclustered version, in terms of firing rate distributions and distributions of  
218 spiking irregularity quantified by CV ISI and revised local variation (LvR). The main exception is V4 layers  
219 2 and 3, for which the original model performs better. Increasing the number of clusters beyond a few dozen  
220 consistently improves the goodness of fit to the experimental data.

221 The ability to reliably and quickly transmit signals through the brain is critical for implementing a large number  
222 of functions. Studying the neuronal basis of complex interactions of feedforward and feedback signals requires a  
223 biologically realistic model supporting signal propagation. Joglekar et al. (2018) studied signal transmission in a  
224 large-scale model of macaque cortex consisting of population rate models and in a spiking network model. The  
225 authors increased cortico-cortical excitatory-to-excitatory and local inhibitory-to-excitatory weights, a scheme  
226 they called global balanced amplification following Murphy and Miller (2009). While V1 activation led to signal  
227 propagation to some areas in the asynchronous regime, reliable signal propagation across the entire network  
228 was only achieved in a synchronized regime. The laminar structure of cortex was neglected and a constant  
229 rather than an area- and population-specific connection probability was used. Furthermore, the network was  
230 heavily downscaled, containing only 2000 neurons per area, so that an area in their model can be thought of as  
231 corresponding roughly to a single cluster in our model. The present study shows how joint clustering of excitatory

232 and inhibitory neurons can support signal propagation across the cortical network at a realistic density of neurons  
233 and synapses while maintaining overall asynchronous irregular firing.

234 The presented clustered model can transmit signals in bottom-up and top-down directions. The signal transmission  
235 enabled us to study the response latencies of feedforward signals and compare them with experimental data.  
236 In V2 and V4, areas close to V1, the origin of the stimulus, response latencies match well with the reported  
237 timings. Also the response latency of area TF and the average latencies of areas AITd and AITv are similar to  
238 the experimental findings. To the remaining areas tested, the propagation delay is longer than reported in the  
239 literature. We hypothesize that including a pulvinar module could speed up the corresponding signal propagation.  
240 The pulvinar connects with most areas of visual cortex (Shipp, 2003; Jones, 2012; Noudoost et al., 2010). Thus,  
241 it could decrease latencies by acting as a shortcut linking distant hierarchical levels (Cortes and Van Vreeswijk,  
242 2012; Zajzon and Morales-Gregorio, 2019).

243 Moreover, including a pulvinar module could facilitate the study of attentional processing: Pulvinar neurons show  
244 firing rate modulation with attention (Petersen et al., 1987), and lesions to the pulvinar result in hemispatial  
245 neglect toward the contralesional visual field (Petersen et al., 1987; Karnath et al., 2002; Wilke et al., 2010, 2013)  
246 and problems in distractor filtering (Desimone et al., 1990), which has also been shown in a computational study  
247 (Jaramillo et al., 2019). Attention can be directed by either physical salience of a stimulus (bottom-up) or internal  
248 behavioral goals (top-down) (Noudoost et al., 2010). Thus, an extension of the presented model could be used to  
249 study the interplay of these two attentional streams and to reproduce experimental findings requiring top-down  
250 and bottom-up interactions.

251 Finally, we studied trial-to-trial variability. An experimental study (Churchland et al., 2010) reports quenching  
252 of the Fano factor as a direct result of stimulation. No decline in the Fano factor can be found in the original  
253 model because it cannot effectively transmit signals across areas. Moreover, neurons in some areas show an  
254 exceptionally high Fano factor. The clustered model, however, displays a clear decline in the Fano factor following  
255 the stimulation. The decline lasts as long as the stimulation is active. In contrast, a slowly rising Fano factor  
256 follows an initial, low plateau in the experimental data. We hypothesize that using an adaptive neuron model  
257 would allow the model to adjust to the stimulation input, and thus, the Fano factor would rise slowly after  
258 reaching a minimum.

259 In a next step, the size of the clusters could be made area-specific. The Kolmogorov-Smirnov distance of the  
260 CV ISI (Fig. 4) decreases with the number of clusters. With the current setup, further increasing the number of  
261 clusters is not feasible, as the model is already highly computationally intensive. The network construction time  
262 jumps from one minute in the original model to seven hours in the clustered model. The increased construction  
263 time is due to the increased numbers of `nest.Connect` calls: The original model has 254 populations connected  
264 using  $9,116$  connect calls. The clustered model consisting of 50 clusters has  $50 \cdot 254 = 12,700$  populations connected  
265 by  $9,116 \cdot 50^2 = 22,790,000$  connect calls. This number could potentially be reduced by implementing a specialized  
266 connection routine in the NEST simulator to handle clustered connectivity.

267 To summarize, we introduce joint excitatory-inhibitory clustering in a biologically based multi-scale spiking  
268 model of one hemisphere of macaque vision-related cortex. This connectivity scheme supports inter-area signal  
269 propagation and a reduction in trial-to-trial variability upon stimulation, and enabled us to study response  
270 latencies. Furthermore, the clustered model reproduces spiking activity statistics in several cortical areas and  
271 retains most of the explanatory power of the original model. The clustered model can be used in future studies  
272 to elucidate information processing involving bottom-up and top-down interactions and to study the impact of  
273 subcortical structures on signal propagation.

274

## 275 **Methods**

### 276 **Multi-area model of macaque visual cortex**

277 The multi-area model is a multi-scale spiking network model of the vision-related areas in one hemisphere of  
278 macaque cortex and relates cortical connectivity to its resting-state dynamics. It integrates cortical architecture  
279 and connectivity data into a comprehensive network of 32 areas. Each area consists of the four layers 2/3, 4, 5,  
280 and 6, containing one excitatory and one inhibitory population each, and is represented by a patch of  $1\text{ mm}^2$ .  
281 Only agranular area TH consists of three layers, as it lacks layer 4. Table 2 summarizes the original and modified  
282 model, and Table 3 gives the neuron and synapse parameters. The inter-area (cortico-cortical) connectivity  
283 is based on axonal tracing data from the CoCoMac database (Bakker et al., 2012) combined with data from  
284 quantitative and layer-specific retrograde tracing experiments (Markov et al., 2014b,a). Local connectivity is  
285 based on the microcircuit model of Potjans and Diesmann (2014). The local microcircuit is customized for every  
286 area according to the neuronal densities and laminar thicknesses (Schmidt et al., 2018a). Combining local and  
287 cortico-cortical connectivity results in a connectivity matrix which is then stabilized using mean-field theory.  
288 The stabilization is necessary to arrive at a dynamical state that yields non-vanishing, non-saturating spike  
289 rates (Schuecker et al., 2017). The refined connectivity is used to simulate macaque vision-related cortex. By  
290 controlling the strength of the cortico-cortical interactions, the model can be poised in a metastable state where  
291 simulations reproduce local and cortico-cortical experimental findings (Schmidt et al., 2018b): the V1 single-cell  
292 spiking statistics, expressed as firing rates and power spectra, are close to those from recordings in macaque V1.  
293 The resulting inter-area functional connectivity patterns match macaque fMRI data. The model yields population  
294 bursts that propagate mainly in the feedback direction. In the following, we poise the model in the metastable  
295 state and refer to it as the original model.

296 We extend this model by providing the possibility of injecting a stimulus of variable length and strength into any  
297 area. The stimulation consists of spike trains drawn from Poisson processes. The multi-area model distinguishes  
298 between input stemming from modeled neurons inside and across areas, and input originating outside the simulated  
299 circuitry—that is, the rest of cortex and subcortical structures. The latter input is the background activity  
300 driving the multi-area model. We assume that this input becomes stronger during stimulation and thus use the  
301 corresponding connections to stimulate the model. The spike trains representing the stimulation are drawn from  
302 Poisson processes with stationary rate  $\nu_{stim} = 30$  spikes/s and are independent to each target neuron.

### 303 **Clustered multi-area model of macaque visual cortex**

304 We generalize a connectivity scheme previously studied in binary (Rost et al., 2018) and spiking networks (Rostami  
305 et al., 2022) of one excitatory and one inhibitory population. Our basic building blocks are the layer-resolved  
306 microcircuits representing each area. We subdivide these basic building blocks into  $Q$  equally sized clusters  
307 spanning all layers of cortex. Each cluster thus consists of four excitatory and four inhibitory populations, an  
308 excitatory-inhibitory pair of populations for each layer. Within a cluster, the excitatory-to-excitatory (EE)  
309 synaptic connections are potentiated by a factor  $J_{E+}$ . The excitatory-to-inhibitory (EI), inhibitory-to-excitatory  
310 (IE), and inhibitory-to-inhibitory (II) synaptic connections are potentiated by a factor  $J_{I+}$ . Across clusters, the  
311 EE connections are depressed by a factor  $J_{E-}$ , whereas the EI, IE, and II connections are depressed by a factor  
312  $J_{I-}$ . Additionally, a proportionality factor  $R_J = 3/4$  is introduced to help prevent firing rate saturation in up  
313 states. The factors are related as follows:

$$\begin{aligned}J_{E-} &= \frac{Q - J_{E+}}{Q - 1} \\J_{I+} &= 1 + R_J(J_{E+} - 1) \\J_{I-} &= \frac{Q - J_{I+}}{Q - 1}.\end{aligned}$$

314 Furthermore, every local cluster has a matching cluster in all other areas that it connects to. The weights between  
315 these clusters are scaled as within-cluster weights. Conversely, all cortico-cortical weights between non-matching  
316 clusters are scaled as across-cluster weights. A sketch of the network is given in Fig. 1. Following Schmidt  
317 et al. 2018b, just as in the original model, we scale cortico-cortical weights onto excitatory populations with a  
318 factor  $\chi$  and cortico-cortical weights onto inhibitory populations with a factor  $\chi_I\chi$ . In the case of one cluster,  
319 which corresponds to the network studied in Schmidt et al. (2018b), the scaling parameters are  $\chi = 1.9$  and  
320  $\chi_I = 2$ . In all simulations involving clusters, we use  $\chi = 2$ . and  $\chi_I = 2.2$ . The parameters are given in Table  
321 3. Just as in the original model, we draw independent spike trains from Poisson processes with a stationary  
322 rate  $\nu_{stim} = 30$  spikes/s representing subcortical input to stimulate the model for variable length and strength.  
323 However, we selectively stimulate one cluster instead of the whole area. Unless stated otherwise, we report results  
324 obtained for the model with  $Q = 50$  clusters and refer to it as the clustered model.

## 325 Network simulations

326 We use commit *c690b7a* of the NEST 3.0 release (Hahne et al., 2021) running on the JURECA-DC cluster  
327 (Thörnig and von St. Vieth, 2021), which hosts compute nodes consisting of two sockets. Each socket contains a  
328 64-core AMD EPYC Rome 7742cd processor clocked at 2.2 GHz equipped with 512 GB of DDR4 RAM. An InfiniBand  
329 HDR100/HDR network connects the compute nodes. The simulations are performed using 6 compute nodes with  
330 8 MPI processes each and 16 threads per MPI process. With this setup, building the original model takes 1  
331 minute, whereas the clustered model takes 7 hours. A second of biological time of the original model can be  
332 simulated in 165 s. In contrast, the clustered model takes 4 minutes per biological second. In all simulations, time  
333 steps of 0.1 ms are used, and the subthreshold dynamics of the leaky integrate-and-fire neuron model is exactly  
334 integrated (Plesser and Diesmann, 2009). All presented simulations were run for 101.5 s, of which the first 500 ms  
335 are disregarded. In all simulations, spike times were recorded.

## 336 Experimental data

### 337 Spiking data from macaque cortical areas V1 and V4 in layers 5/6

338 Neuronal activity was recorded from visual areas V1 and V4 ( $N = 1$  subject,  $N = 1$  session of  $\sim 20$  min). Chronic  
339 recordings were made using 16 Utah arrays with  $8 \times 8$  electrodes each (Blackrock microsystems), 2 of them in  
340 visual area V4 and the rest in V1, with a total of 1024 electrodes. The electrodes were 1.5 mm long and thus  
341 reached deep layers 5 and 6. The recordings were made in the resting state. The macaque was head-fixed but  
342 free to move its limbs, look around and open or close its eyes. Thus, the spiking statistics include data from a few  
343 different behavioral states. A full description of the experimental setup, the data collection and preprocessing has  
344 already been published (Chen et al., 2022). The raw data were spike-sorted using a semi-automatic workflow with  
345 Spyking Circus—a free, open-source, spike-sorting software written in Python (Yger et al., 2018). Multielectrode  
346 recordings are prone to cross-talk in the signals leading to above-chance synchronous spiking events. All single  
347 units suspected to be cross-talk artifacts were removed from further analysis (Oberste-Frielinghaus et al., 2024).  
348 The spiking data were previously published elsewhere (Morales-Gregorio et al., 2023).

### 349 Spiking data from macaque cortical areas V4 and FEF in layers 2/3

350 Neuronal activity was recorded from visual area V4 and dorsolateral prefrontal cortex (dlPFC), specifically a part  
351 of the frontal eye field ( $N = 1$  subject,  $N = 59$  sessions of  $\sim 5$  min). Acute recordings were made with up to four  
352 simultaneous Plexon electrodes, recording from the superficial layers (L2/3) during resting state. The macaque  
353 was free to move its limbs, look around and open or close its eyes. Thus, the spiking statistics include data from  
354 a few different behavioral states. Spike sorting identified 4–10 clean single units per area and session. Single  
355 units suspected to be cross-talk artifacts were removed from further analysis (Oberste-Frielinghaus et al., 2024).  
356 These data correspond to recordings before or after the behavioral task published in (Sapountzis et al., 2022),  
357 using the same recording apparatus.

### 358 Spiking data from macaque cortical areas DP and 7a in layers 5/6

359 Neuronal activity was recorded from V1, V2, DP, 7a, and motor cortex ( $N = 1$  subject,  $N = 2$  sessions of  
360  $\sim 10$  min). The macaque was implanted with five Utah arrays (Blackrock microsystems), one in V1, one in V2,  
361 one in dorsal prelunate cortex (area DP), one in area 7a and one in the motor cortex (M1/PMd). In this study,  
362 we only included the  $6 \times 6$  electrode arrays from DP and 7a since not enough spikes could be detected in V1 and  
363 V2. The electrodes were 1.5 mm long and thus recorded from the deep layers (L5/6) of the cortex. The recordings  
364 were made in the resting state. The macaque was free to move its limbs, look around and open or close its eyes.  
365 Thus, the spiking statistics include data from a few different behavioral states. The raw signals were spike sorted  
366 using the Plexon software. Single units suspected to be cross-talk artifacts were removed from further analysis  
367 (Oberste-Frielinghaus et al., 2024). The recording apparatus is described elsewhere (de Haan et al., 2018).

### 368 Datasets used in Churchland et al. (2010)

369 Churchland et al. (2010) analyze the Fano factor in seven cortical areas of the macaque monkey: V1, V4, MT,  
370 LIP, PRR, PMd, and OFC. In the following, we only consider the first four, as these are part of the multi-area  
371 model. Area MT was studied in four different experiments, of which two involved two stimulations. We focus on  
372 the experiments in which only one stimulus was applied. The V1 data was taken from an anesthetized monkey,  
373 which was presented a 100% contrast sine-wave grating drifting in one of twelve directions. V4 data is taken from  
374 a task where the stimulation consisted of one or two oriented bars placed in the neuron’s receptive field. In some  
375 experiments, similar bars were placed in the opposite hemifield. The first MT task involved square-wave gratings  
376 superimposed to produce a plaid as a visual stimulus. The second stimulation consisted of 0% coherence random  
377 dots. The LIP stimulation consisted of two colored saccade targets from which the monkey could choose. To  
378 compare the experimental with the simulated data, we extract the experimental Fano factors from Figure 3 in  
379 Churchland et al. (2010) using the tool WebPlotDigitizer<sup>1</sup>.

## 380 Analysis methods

### 381 Summary statistics of the resting-state spiking activity

382 We use several standard metrics to characterize the resting-state neural activity and to compare the models and  
383 experimental data. We use the coefficient of variation of the inter-spike interval distribution (CV ISI) and revised  
384 local variation (LvR; Shinomoto et al., 2009) to characterize interval statistics. The CV ISI is defined as the ratio  
385 of the standard deviation  $\sigma$  to the mean  $\mu$  of the inter-spike intervals,

$$C_V = \frac{\sigma}{\mu}.$$

---

<sup>1</sup><https://automeris.io/WebPlotDigitizer/>

386 The LvR is defined as

$$\begin{aligned}LvR &= \frac{3}{n-1} \sum_{i=1}^{n-1} \left( \frac{I_i - I_{i+1}}{I_i + I_{i+1}} \right) \left( 1 + \frac{4\tau_r}{I_i + I_{i+1}} \right) \\ &= \frac{3}{n-1} \sum_{i=1}^{n-1} \left( 1 - \frac{4I_i I_{i+1}}{(I_i + I_{i+1})^2} \right) \left( 1 + \frac{4\tau_r}{I_i + I_{i+1}} \right).\end{aligned}$$

387 The first term computes the local variance of consecutive inter-spike intervals  $I_i$  while the second term accounts  
388 for the refractoriness of the neuron.

389 The distribution of spike rates  $P(\text{rate})$  is calculated as the histogram of spike rates of all spike trains, computed  
390 as the total number of spikes of each neuron divided by the simulation time.

391 For the experimental data, the CV, LvR, and  $P(\text{rate})$  are calculated for all spike trains. Where the simulated  
392 data are compared against experimental data, as many spike trains as there are in the experimental data are  
393 used from randomly drawn neurons. The metrics are then calculated for this subset. This procedure is repeated  
394 100 times, and the mean and standard deviation are calculated. Otherwise, all spike trains from the population  
395 are used.

### 396 Response latency measurement via Poisson surprise

397 We derive response latencies in a set of areas resulting from an input to V1 employing the Poisson surprise  
398 method. This method was first used by [Legendy and Salzman \(1985\)](#) and further refined by [Hanes et al. \(1995\)](#)  
399 and [Thompson et al. \(1996\)](#). For a given neuron with mean firing rate  $r$ , this method evaluates how improbable  
400 it is that a series of  $n$  spikes, which we call response, in a given time interval  $T$  occurs by chance. The probability  
401  $P$  is calculated using Poisson's formula

$$P = e^{-rT} \sum_{i=n}^{\infty} \frac{(rT)^i}{i!}.$$

402 The surprise index

$$S_I = -\log P$$

403 serves as a measure of improbability and yields higher values the more unexpected, or improbable, a result is. In  
404 order to detect the response latencies in a given area, we apply the following algorithm to every neuron in the  
405 area and identify neurons that exhibit a clear response in at least 60% of the trials. This procedure finds the  
406 neurons that reliably respond to the provided stimulus and corresponds to experimentalists probing for responsive  
407 neurons. We follow the procedure described by [Hanes et al. \(1995\)](#):

- 408 1. We calculate the mean firing rate  $r$  the neuron for the whole simulation time.
- 409 2. We split the spike train into trials, spanning the time between each stimulus onset. For each trial, starting  
410 with the first spike, we search for the first two consecutive spikes with a mean firing rate  $\tilde{r}$  greater or equal  
411 to  $r$ . Then, the first two spikes remain fixed, the next spike is added to the sequence of spikes and the  
412 surprise index  $S_I$  is calculated. This is done until reaching the end of the trial. The spike where  $S_I$  is  
413 maximized is defined as the end of the assumed response.
- 414 3. To detect responses, we first follow [Legendy and Salzman \(1985\)](#), fixing the last spike of the assumed  
415 response and calculating the surprise index  $S_I$  for all previous spikes. The spike where the surprise index



416  $S_I$  is maximized is defined as the first spike of the assumed response. Some cortical areas have more  
417 gradual responses than the bursting responses considered by Legendy and Salcman (1985). To account  
418 for this, Hanes et al. (1995) extended the method from Legendy and Salcman (1985) to determine when a  
419 nonbursting change in the activity of the neuron becomes significantly different from the expected Poisson  
420 distribution. We follow Hanes et al. (1995) to detect such slow-rising responses. Spikes are added before the  
421 one maximizing the surprise index until the surprise index  $S_I$  falls below a reduced significance threshold or  
422 the algorithm reaches the first spike of the trial. The significance level is set to  $p < 0.01$  and relaxed to  
423  $p < 0.05$  in areas 7a, MT, MSTl, TF, and FEF. The relaxation is necessary as responses in these areas  
424 otherwise go mostly undetected. The assumed response is rejected if its surprise index  $S_I$  is not significant.

#### 425 **Neural variability quantification across trials**

426 The Fano factor is a measure of the variability of spike trains. It is defined as the ratio of the variance and the  
427 mean of the spike counts and measures the response variability across repetitions of the same experimental task,  
428 that is, across trials. While its definition is transparent, its results might suffer from careless use (Churchland  
429 et al., 2010; Rajdl et al., 2020): At higher spiking rates, the refractory periods of the neurons tend to regularize  
430 spiking, which could lower the Fano factor due to the variability of the spiking noise being reduced. Furthermore,  
431 the across-trial firing-rate variability could be constant but become normalized by a higher mean after stimulus  
432 onset. To control for the influence of the firing rates, we apply the mean matching procedure described by  
433 Churchland et al. (2010).

434 The mean matching procedure works as follows: First, for each neuron, we compute the mean and the variance of  
435 the spike counts in a sliding window. Second, we construct the greatest common distribution based on the mean  
436 and the variance. The bins of this common distribution have a height equal to the smallest value for that bin  
437 across all distributions at all times. Third, at each time, individual points consisting of the mean and variance of  
438 the spike counts are excluded until matching the common distribution. Fourth, based on the remaining points,  
439 we calculate the Fano factor. Like Churchland et al. (2010), we use a 50 ms wide sliding window that moves in  
440 steps of 10 ms.

441 **Tables**

Table 1: The areas of the model, which include all vision-related areas of macaque cortex in the parcellation of Felleman and Van Essen (1991).

| Areas in the model |              |                                                |                                         |
|--------------------|--------------|------------------------------------------------|-----------------------------------------|
| Lobe               | Abbreviation | Brain Region                                   |                                         |
| Occipital          | V1           | Visual area 1                                  |                                         |
|                    | V2           | Visual area 2                                  |                                         |
|                    | V3           | Visual area 3                                  |                                         |
|                    | VP           | Ventral posterior area                         |                                         |
|                    | V3A          | Visual area V3A                                |                                         |
|                    | V4           | Visual area 4                                  |                                         |
|                    | VOT          | Ventral occipitotemporal area                  |                                         |
|                    | V4t          | V4 transitional area                           |                                         |
|                    | MT           | Middle temporal area                           |                                         |
| Temporal           | FST          | Floor of superior temporal area                |                                         |
|                    | PITd         | Posterior inferotemporal (dorsal) area         |                                         |
|                    | PITv         | Posterior inferotemporal (ventral) area        |                                         |
|                    | CITd         | Central inferotemporal (dorsal) area           |                                         |
|                    | CITv         | Central inferotemporal (ventral) area          |                                         |
|                    | AITd         | Anterior inferotemporal (dorsal) area          |                                         |
|                    | AITv         | Anterior inferotemporal (ventral) area         |                                         |
|                    | STPp         | Superior temporal polysensory (posterior) area |                                         |
|                    | STPa         | Superior temporal polysensory (anterior) area  |                                         |
|                    | TF           | Parahippocampal area TF                        |                                         |
|                    | TH           | Parahippocampal area TH                        |                                         |
|                    | Parietal     | MSTd                                           | Medial superior temporal (dorsal) area  |
|                    |              | MSTl                                           | Medial superior temporal (lateral) area |
| PO                 |              | Parieto-occipital area                         |                                         |
| PIP                |              | Posterior intraparietal area                   |                                         |
| LIP                |              | Lateral intraparietal area                     |                                         |
| VIP                |              | Ventral intraparietal area                     |                                         |
| MIP                |              | Medial intraparietal area                      |                                         |
| MDP                |              | Medial dorsal parietal area                    |                                         |
| DP                 |              | Dorsal prelunate area                          |                                         |
| 7a                 | Area 7a      |                                                |                                         |
| Frontal            | FEF          | Frontal eye field                              |                                         |
|                    | 46           | Middle frontal area 46                         |                                         |

Table 2: Model description after Nordlie et al. (2009).

| Model summary                |                                                                                                                                                                                                                                                                                                                                                                                                                                                                                                                                                                                                                                                                                                                                                                                                                                                                                                  |
|------------------------------|--------------------------------------------------------------------------------------------------------------------------------------------------------------------------------------------------------------------------------------------------------------------------------------------------------------------------------------------------------------------------------------------------------------------------------------------------------------------------------------------------------------------------------------------------------------------------------------------------------------------------------------------------------------------------------------------------------------------------------------------------------------------------------------------------------------------------------------------------------------------------------------------------|
| <b>Populations</b>           | Original model: 254 populations: 32 areas (Table 1) with eight populations each (area TH: six)<br>Clustered model: Each population is further subdivided into $Q$ clusters.                                                                                                                                                                                                                                                                                                                                                                                                                                                                                                                                                                                                                                                                                                                      |
| <b>Topology</b>              | —                                                                                                                                                                                                                                                                                                                                                                                                                                                                                                                                                                                                                                                                                                                                                                                                                                                                                                |
| <b>Connectivity</b>          | area- and population-specific but otherwise random                                                                                                                                                                                                                                                                                                                                                                                                                                                                                                                                                                                                                                                                                                                                                                                                                                               |
| <b>Neuron model</b>          | leaky integrate-and-fire (LIF), fixed absolute refractory period (voltage clamp)                                                                                                                                                                                                                                                                                                                                                                                                                                                                                                                                                                                                                                                                                                                                                                                                                 |
| <b>Synapse model</b>         | exponential postsynaptic currents                                                                                                                                                                                                                                                                                                                                                                                                                                                                                                                                                                                                                                                                                                                                                                                                                                                                |
| <b>Plasticity</b>            | —                                                                                                                                                                                                                                                                                                                                                                                                                                                                                                                                                                                                                                                                                                                                                                                                                                                                                                |
| <b>Input</b>                 | independent homogeneous Poisson spike trains                                                                                                                                                                                                                                                                                                                                                                                                                                                                                                                                                                                                                                                                                                                                                                                                                                                     |
| <b>Measurements</b>          | spiking activity                                                                                                                                                                                                                                                                                                                                                                                                                                                                                                                                                                                                                                                                                                                                                                                                                                                                                 |
| Populations                  |                                                                                                                                                                                                                                                                                                                                                                                                                                                                                                                                                                                                                                                                                                                                                                                                                                                                                                  |
| <b>Type</b>                  | Cortex                                                                                                                                                                                                                                                                                                                                                                                                                                                                                                                                                                                                                                                                                                                                                                                                                                                                                           |
| <b>Elements</b>              | LIF neurons                                                                                                                                                                                                                                                                                                                                                                                                                                                                                                                                                                                                                                                                                                                                                                                                                                                                                      |
| <b>Number of populations</b> | 32 areas with eight populations each (area TH: six), two per layer                                                                                                                                                                                                                                                                                                                                                                                                                                                                                                                                                                                                                                                                                                                                                                                                                               |
| <b>Population size</b>       | $N$ (area- and population-specific)                                                                                                                                                                                                                                                                                                                                                                                                                                                                                                                                                                                                                                                                                                                                                                                                                                                              |
| Connectivity                 |                                                                                                                                                                                                                                                                                                                                                                                                                                                                                                                                                                                                                                                                                                                                                                                                                                                                                                  |
| <b>Type</b>                  | source and target neurons drawn randomly with replacement (allowing autapses and multapses) with area- and population-specific connection probabilities                                                                                                                                                                                                                                                                                                                                                                                                                                                                                                                                                                                                                                                                                                                                          |
| <b>Weights</b>               | fixed, drawn from normal distribution with mean $J$ such that postsynaptic potentials have a mean amplitude of 0.15 mV and standard deviation $\delta J = 0.1J$ ; 4E to 2/3E increased by factor 2 (cf. Potjans and Diesmann, 2014); weights of inhibitory connections increased by factor $g$ ; excitatory weights $< 0$ and inhibitory weights $> 0$ are redrawn; cortico-cortical weights onto excitatory and inhibitory populations increased by factor $\chi$ and $\chi_I\chi$ , respectively                                                                                                                                                                                                                                                                                                                                                                                               |
| <b>Delays</b>                | fixed, drawn from Gaussian distribution with mean $d$ and standard deviation $\delta d = 0.5d$ ; delays of inhibitory connections factor 2 smaller; delays rounded to the nearest multiple of the simulation step size $h = 0.1$ ms, inter-area delays drawn from a Gaussian distribution with mean $d = s/v_t$ , with distance $s$ and transmission speed $v_t = 3.5$ m/s (Girard et al., 2001); and standard deviation $\delta d = d/2$ , distances determined as the median of the distances between all vertex pairs of the two areas in their surface representation in F99 space, a standard macaque cortical surface included with Caret (Van Essen et al., 2001), where the vertex-to-vertex distance is the length of the shortest possible path without crossing the cortical surface (Bojak et al., 2011) (see Schmidt et al. (2018a)), delays $< 0.1$ ms before rounding are redrawn |
| Neuron and synapse model     |                                                                                                                                                                                                                                                                                                                                                                                                                                                                                                                                                                                                                                                                                                                                                                                                                                                                                                  |
| <b>Name</b>                  | LIF neuron                                                                                                                                                                                                                                                                                                                                                                                                                                                                                                                                                                                                                                                                                                                                                                                                                                                                                       |
| <b>Type</b>                  | leaky integrate-and-fire, exponential synaptic current inputs                                                                                                                                                                                                                                                                                                                                                                                                                                                                                                                                                                                                                                                                                                                                                                                                                                    |
| <b>Subthreshold dynamics</b> | $\frac{dV}{dt} = -\frac{V-E_L}{\tau_m} + \frac{I_s(t)}{C_m}$ , if $(t > t^* + \tau_r)$<br>$V(t) = V_r$ , else<br>$I_s(t) = \sum_{i,k} J_k e^{-(t-t_i^k)/\tau_s} \Theta(t - t_i^k)$ , $k$ : neuron index, $i$ : spike index                                                                                                                                                                                                                                                                                                                                                                                                                                                                                                                                                                                                                                                                       |
| <b>Spiking</b>               | If $V(t-) < \theta \wedge V(t+) \geq \theta$<br>1. set $t^* = t$ , 2. emit spike with time stamp $t^*$                                                                                                                                                                                                                                                                                                                                                                                                                                                                                                                                                                                                                                                                                                                                                                                           |
| Input                        |                                                                                                                                                                                                                                                                                                                                                                                                                                                                                                                                                                                                                                                                                                                                                                                                                                                                                                  |
| <b>Type</b>                  | Background                                                                                                                                                                                                                                                                                                                                                                                                                                                                                                                                                                                                                                                                                                                                                                                                                                                                                       |
| <b>Target</b>                | LIF neurons                                                                                                                                                                                                                                                                                                                                                                                                                                                                                                                                                                                                                                                                                                                                                                                                                                                                                      |
| <b>Description</b>           | independent Poisson spikes (for each neuron, fixed rate $\nu_{\text{ext}} = \nu_{\text{bg}} k_{\text{ext}}$ with average external spike rate $\nu_{\text{bg}} = 10$ spikes/s and number of external inputs per population $k_{\text{ext}}$ , weight $J$ )                                                                                                                                                                                                                                                                                                                                                                                                                                                                                                                                                                                                                                        |
| Measurements                 |                                                                                                                                                                                                                                                                                                                                                                                                                                                                                                                                                                                                                                                                                                                                                                                                                                                                                                  |
|                              | Spiking activity                                                                                                                                                                                                                                                                                                                                                                                                                                                                                                                                                                                                                                                                                                                                                                                                                                                                                 |

Table 3: Parameter specification for synapses and neurons.

| Synapse parameters   |                                                                                                                                                                                                                                                                                                                                                                                                                                                                       |                                                                    |
|----------------------|-----------------------------------------------------------------------------------------------------------------------------------------------------------------------------------------------------------------------------------------------------------------------------------------------------------------------------------------------------------------------------------------------------------------------------------------------------------------------|--------------------------------------------------------------------|
| Name                 | Value                                                                                                                                                                                                                                                                                                                                                                                                                                                                 | Description                                                        |
| $J \pm \delta J$     | Intra-areal connections: $87.8 \pm 8.8$ pA, cortico-cortical connections in model with one cluster scaled as $J_{cc} = 1.9 \cdot J$ , cortico-cortical connections in clustered model scaled as $J_{cc} = 2 \cdot J$ , cortico-cortical connections onto inhibitory populations in model with one cluster scaled as $J_{cc}^I = 2 \cdot J_{cc}$ , cortico-cortical connections onto inhibitory populations in clustered model scaled as $J_{cc}^I = 2.2 \cdot J_{cc}$ | excitatory synaptic strength                                       |
|                      | numbers of clusters $Q \in [2, 50]$ . Within-cluster EE connections scaled with $J_{E+} = 0.3 \cdot Q$ rounded to the next integer. Connections involving inhibitory populations in addition scaled with proportionality factor $R_J = 3/4$                                                                                                                                                                                                                           | cluster scaling parameters                                         |
| $g$                  | $g = 11$                                                                                                                                                                                                                                                                                                                                                                                                                                                              | relative inhibitory synaptic strength                              |
| $d_e \pm \delta d_e$ | $1.5 \pm 0.75$ ms                                                                                                                                                                                                                                                                                                                                                                                                                                                     | local excitatory transmission delay                                |
| $d_i \pm \delta d_i$ | $0.75 \pm 0.375$ ms                                                                                                                                                                                                                                                                                                                                                                                                                                                   | local inhibitory transmission delay                                |
| $d \pm \delta d$     | $d = s/v_t \pm \frac{1}{2}s/v_t$                                                                                                                                                                                                                                                                                                                                                                                                                                      | inter-area transmission delay, with $s$ the distance between areas |
| $v_t$                | 3.5 m/s                                                                                                                                                                                                                                                                                                                                                                                                                                                               | transmission speed                                                 |
| Neuron parameters    |                                                                                                                                                                                                                                                                                                                                                                                                                                                                       |                                                                    |
| Name                 | Value                                                                                                                                                                                                                                                                                                                                                                                                                                                                 | Description                                                        |
| $\tau_m$             | 10 ms                                                                                                                                                                                                                                                                                                                                                                                                                                                                 | membrane time constant                                             |
| $\tau_r$             | 2 ms                                                                                                                                                                                                                                                                                                                                                                                                                                                                  | absolute refractory period                                         |
| $\tau_s$             | 0.5 ms                                                                                                                                                                                                                                                                                                                                                                                                                                                                | postsynaptic current time constant                                 |
| $C_m$                | 250 pF                                                                                                                                                                                                                                                                                                                                                                                                                                                                | membrane capacity                                                  |
| $V_r$                | -65 mV                                                                                                                                                                                                                                                                                                                                                                                                                                                                | reset potential                                                    |
| $\theta$             | -50 mV                                                                                                                                                                                                                                                                                                                                                                                                                                                                | fixed firing threshold                                             |
| $E_L$                | -65 mV                                                                                                                                                                                                                                                                                                                                                                                                                                                                | leak potential                                                     |

## 442 Acknowledgements

443 This project received funding from the DFG in RTG 2416 "MultiSenses-MultiScales" and Priority Program  
 444 2041 "Computational Connectomics" [AL 2041/1-1]; and the EU's Horizon 2020 Framework Grant Agreement  
 445 No. 785907 (Human Brain Project SGA2) and No. 945539 (Human Brain Project SGA3). A subset of the  
 446 experimental data was made available in the context of the FLAG-ERA grant PrimCorNet. The authors gratefully  
 447 acknowledge the computing time granted by the JARA Vergabegremium and provided on the JARA Partition  
 448 part of the supercomputer JURECA at Forschungszentrum Jülich (computation grant JINB33).

## 449 Author contributions

450 Conceptualization JP, SvA; Data curation JP, AMG; Formal Analysis JP; Investigation JP; Methodology JP, VR,  
 451 SvA; Software JP; Visualization JP, AMG; Writing – original draft JP; Writing – review & editing JP, AMG,  
 452 VR, SvA; Supervision SvA; Funding acquisition SvA

## 453 References

454 Akeju, O., Song, A. H., Hamilos, A. E., Pavone, K. J., Flores, F. J., Brown, E. N., Purdon, P. L., 2016.  
 455 Electroencephalogram signatures of ketamine anesthesia-induced unconsciousness. Clin. Neurophysiol. 127 (6),  
 456 2414–2422.

- 457 Amit, D. J., Brunel, N., Apr. 1997. Model of global spontaneous activity and local structured activity during  
458 delay periods in the cerebral cortex. *Cereb. Cortex* 7, 237–252.
- 459 Arkhipov, A., Gouwens, N. W., Billeh, Y. N., Gratiy, S., Iyer, R., Wei, Z., Xu, Z., Abbasi-Asl, R., Berg, J.,  
460 Buice, M., et al., 2018. Visual physiology of the layer 4 cortical circuit in silico. *PLOS Comput. Biol.* 14 (11),  
461 e1006535.
- 462 Babapoor-Farrokhran, S., Hutchison, R. M., Gati, J. S., Menon, R. S., Everling, S., 2013. Functional connectivity  
463 patterns of medial and lateral macaque frontal eye fields reveal distinct visuomotor networks. *J. Neurophysiol.*  
464 109 (10), 2560–2570.
- 465 Bakker, R., Thomas, W., Diesmann, M., 2012. CoCoMac 2.0 and the future of tract-tracing databases. *Front.*  
466 *Neuroinform.* 6, 30.
- 467 Barash, S., Bracewell, R. M., Fogassi, L., Gnadt, J. W., Andersen, R. A., 1991. Saccade-related activity in the  
468 lateral intraparietal area. i. temporal properties; comparison with area 7a. *J. Neurophysiol.* 66 (3), 1095–1108,  
469 PMID: 1753276.
- 470 Bojak, I., Oostendorp, T. F., Reid, A. T., Kötter, R., 2011. Towards a model-based integration of co-registered  
471 electroencephalography/functional magnetic resonance imaging data with realistic neural population meshes.  
472 *Philos. Trans. R. Soc. A* 369 (1952), 3785–3801.
- 473 Bushnell, M. C., Goldberg, M. E., Robinson, D. L., 1981. Behavioral enhancement of visual responses in monkey  
474 cerebral cortex. i. modulation in posterior parietal cortex related to selective visual attention. *J. Neurophysiol.*  
475 46 (4), 755–772, PMID: 7288463.
- 476 Chafee, M. V., Goldman-Rakic, P. S., 1998. Matching patterns of activity in primate prefrontal area 8a and  
477 parietal area 7ip neurons during a spatial working memory task. *J. Neurophysiol.* 79 (6), 2919–2940, PMID:  
478 9636098.
- 479 Chen, X., Morales-Gregorio, A., Sprenger, J., Kleinjohann, A., Sridhar, S., van Albada, S. J., Grün, S., Roelfsema,  
480 P. R., Dec. 2022. 1024-channel electrophysiological recordings in macaque V1 and V4 during resting state. *Sci.*  
481 *Data* 9 (1), 77.
- 482 Chu, C. C. J., Chien, P. F., Hung, C. P., 2014a. Multi-electrode recordings of ongoing activity and responses to  
483 parametric stimuli in macaque V1. *CRCNS.org*.
- 484 Chu, C. C. J., Chien, P. F., Hung, C. P., Mar. 2014b. Tuning dissimilarity explains short distance decline of  
485 spontaneous spike correlation in macaque V1. *Vision Res.* 96, 113–132.
- 486 Churchland, M. M., Yu, B. M., Cunningham, J. P., Sugrue, L. P., Cohen, M. R., Corrado, G. S., Newsome, W. T.,  
487 Clark, A. M., Hosseini, P., Scott, B. B., Bradley, D. C., Smith, M. A., Kohn, A., Movshon, J. A., Armstrong,  
488 K. M., Moore, T., Chang, S. W., Snyder, L. H., Lisberger, S. G., Priebe, N. J., Finn, I. M., Ferster, D., Ryu,  
489 S. I., Santhanam, G., Sahani, M., Shenoy, K. V., 2010. Stimulus onset quenches neural variability: a widespread  
490 cortical phenomenon. *Nat. Neurosci.* 13 (3), 369–378.
- 491 Cortes, N., Van Vreeswijk, C., 2012. The role of pulvinar in the transmission of information in the visual hierarchy.  
492 *Front. Comput. Neurosci.* 6, 29.
- 493 de Haan, M. J., Brochier, T., Grün, S., Riehle, A., Barthélemy, F. V., 2018. Real-time visuomotor behavior and  
494 electrophysiology recording setup for use with humans and monkeys. *J. Neurophysiol.* 120 (2), 539–552.
- 495 Deco, G., Rolls, E. T., 2005. Neurodynamics of biased competition and cooperation for attention: A model with  
496 spiking neurons. *J. Neurophysiol.* 94 (1), 295–313, PMID: 15703227.

- 497 Desimone, R., Wessinger, M., Thomas, L., Schneider, W., 1990. Attentional control of visual perception: cortical  
498 and subcortical mechanisms. In: Cold Spring Harbor symposia on quantitative biology. Vol. 55. Cold Spring  
499 Harbor Laboratory Press, pp. 963–971.
- 500 Diesmann, M., Gewaltig, M.-O., Aertsen, A., 1999. Stable propagation of synchronous spiking in cortical neural  
501 networks. *Nature* 402 (6761), 529–533.
- 502 Felleman, D. J., Van Essen, D. C., 1991. Distributed hierarchical processing in the primate cerebral cortex. *Cereb.*  
503 *Cortex* 1, 1–47.
- 504 Girard, P., Hupé, J. M., Bullier, J., 2001. Feedforward and feedback connections between areas v1 and v2 of the  
505 monkey have similar rapid conduction velocities. *J. Neurophysiol.* 85 (3), 1328–1331.
- 506 Hahne, J., Diaz, S., Patronis, A., Schenck, W., Peyser, A., Graber, S., Spreizer, S., Vennemo, S. B., Ippen, T.,  
507 Mørk, H., Jordan, J., Senk, J., Konradi, S., Weidel, P., Fardet, T., Dahmen, D., Terhorst, D., Stapmanns, J.,  
508 Trensck, G., van Meegen, A., Pronold, J., Eppler, J. M., Linssen, C., Morrison, A., Sinha, A., Mitchell, J.,  
509 Kunkel, S., Deepu, R., Hagen, E., Vierjahn, T., Kamiji, N. L., de Schepper, R., Machado, P., Albers, J., Klijn,  
510 W., Myczko, A., Mayner, W., Nagendra Babu, P., Jiang, H., Billaudelle, S., Vogler, B. S., Miotto, G., Kusch,  
511 L., Antonietti, A., Morales-Gregorio, A., Dolderer, J., Bouhadjar, Y., Plesser, H. E., Jun. 2021. Nest 3.0.
- 512 Hanes, D. P., Thompson, K. G., Schall, J. D., 1995. Relationship of presaccadic activity in frontal eye field and  
513 supplementary eye field to saccade initiation in macaque: Poisson spike train analysis. *Exp. Brain Res.* 103 (1),  
514 85–96.
- 515 Hayashi, K., Mukai, N., Sawa, T., 2014. Simultaneous bicoherence analysis of occipital and frontal electroen-  
516 cephalograms in awake and anesthetized subjects. *Clin. Neurophysiol.* 125 (1), 194–201.
- 517 Jaramillo, J., Mejias, J. F., Wang, X.-J., 2019. Engagement of pulvino-cortical feedforward and feedback pathways  
518 in cognitive computations. *Neuron* 101 (2), 321–336.
- 519 Joglekar, M. R., Mejias, J. F., Yang, G. R., Wang, X.-J., 2018. Inter-areal balanced amplification enhances signal  
520 propagation in a large-scale circuit model of the primate cortex. *Neuron* 98 (1), 222–234.
- 521 Jones, E. G., 2012. *The thalamus*. Springer Science & Business Media.
- 522 Karnath, H., Himmelbach, M., Rorden, C., 2002. The subcortical anatomy of human spatial neglect: putamen,  
523 caudate nucleus and pulvinar. *Brain* 125 (2), 350–360.
- 524 Khan, A. G., Poort, J., Chadwick, A., Blot, A., Sahani, M., Mrsic-Flogel, T. D., Hofer, S. B., 2018. Distinct  
525 learning-induced changes in stimulus selectivity and interactions of GABAergic interneuron classes in visual  
526 cortex. *Nat. Neurosci.* 21 (6), 851–859.
- 527 Ko, H., Hofer, S. B., Pichler, B., Buchanan, K. A., Sjöström, P. J., Mrsic-Flogel, T. D., May 2011. Functional  
528 specificity of local synaptic connections in neocortical networks. *Nature* 473 (7345), 87–91.
- 529 Kumar, A., Rotter, S., Aertsen, A., 2008. Conditions for propagating synchronous spiking and asynchronous  
530 firing rates in a cortical network model. *J. Neurosci.* 28 (20), 5268–5280.
- 531 Kumar, A., Rotter, S., Aertsen, A., 2010. Spiking activity propagation in neuronal networks: reconciling different  
532 perspectives on neural coding. *Nat. Rev. Neurosci.* 11, 615–627.
- 533 Lamme, V. A., Roelfsema, P. R., 2000. The distinct modes of vision offered by feedforward and recurrent  
534 processing. *Trends Neurosci.* 23, 571–579.

- 535 Lee, S.-H., Marchionni, I., Bezaire, M., Varga, C., Danielson, N., Lovett-Barron, M., Losonczy, A., Soltesz,  
536 I., 2014. Parvalbumin-positive basket cells differentiate among hippocampal pyramidal cells. *Neuron* 82 (5),  
537 1129–1144.
- 538 Legendy, C. R., Salzman, M., 1985. Bursts and recurrences of bursts in the spike trains of spontaneously active  
539 striate cortex neurons. *J. Neurophysiol.* 53 (4), 926–939.
- 540 Litwin-Kumar, A., Doiron, B., Sep. 2012. Slow dynamics and high variability in balanced cortical networks with  
541 clustered connections. *Nat. Neurosci.* 15 (11), 1498–1505.
- 542 Markov, N. T., Ercsey-Ravasz, M. M., Ribeiro Gomes, A. R., Lamy, C., Magrou, L., Vezoli, J., Misery, P.,  
543 Falchier, A., Quilodran, R., Gariel, M. A., Sallet, J., Gamanut, R., Huissoud, C., Clavagnier, S., Giroud, P.,  
544 Sappey-Marinié, D., Barone, P., Dehay, C., Toroczkai, Z., Knoblauch, K., Van Essen, D. C., Kennedy, H.,  
545 2014a. A weighted and directed interareal connectivity matrix for macaque cerebral cortex. *Cereb. Cortex*  
546 24 (1), 17–36.
- 547 Markov, N. T., Vezoli, J., Chameau, P., Falchier, A., Quilodran, R., Huissoud, C., Lamy, C., Misery, P., Giroud,  
548 P., Ullman, S., Barone, P., Dehay, C., Knoblauch, K., Kennedy, H., 2014b. Anatomy of hierarchy: Feedforward  
549 and feedback pathways in macaque visual cortex. *J. Comp. Neurol.* 522 (1), 225–259.
- 550 Mazzucato, L., Fontanini, A., La Camera, G., 2015. Dynamics of multistable states during ongoing and evoked  
551 cortical activity. *J. Neurosci.* 35 (21), 8214–8231.
- 552 Morales-Gregorio, A., Dąbrowska, P., Gutzen, R., Palmis, S., Paneri, S., René, A., Sapountzis, P., Diesmann,  
553 M., Gruen, S., Senk, J., Gregoriou, G. G., Kilavik, B. E., van Albada, S., 2020. Estimation of the cortical  
554 microconnectome from in vivo spiking activity in the macaque monkey. 29th Annual Computational Neuroscience  
555 Meeting CNS.
- 556 Morales-Gregorio, A., Kurth, A. C., Ito, J., Kleinjohann, A., Barthélemy, F. V., Brochier, T., Grün, S., van  
557 Albada, S. J., 2023. Neural manifolds in V1 change with top-down signals from V4 targeting the foveal region.  
558 *BioRxiv*, 2023–06.
- 559 Morishima, M., Kobayashi, K., Kato, S., Kobayashi, K., Kawaguchi, Y., 10 2017. Segregated excitatory–inhibitory  
560 recurrent subnetworks in layer 5 of the rat frontal cortex. *Cereb. Cortex* 27 (12), 5846–5857.
- 561 Murphy, B. K., Miller, K. D., 2009. Balanced amplification: A new mechanism of selective amplification of neural  
562 activity patterns. *Neuron* 61 (4), 635–648.
- 563 Najafi, F., Elsayed, G. F., Cao, R., Pnevmatikakis, E., Latham, P. E., Cunningham, J. P., Churchland, A. K., 2020.  
564 Excitatory and inhibitory subnetworks are equally selective during decision-making and emerge simultaneously  
565 during learning. *Neuron* 105 (1), 165–179.
- 566 Nordlie, E., Gewaltig, M.-O., Plesser, H. E., Aug. 2009. Towards reproducible descriptions of neuronal network  
567 models. *PLOS Comput. Biol.* 5 (8), e1000456.
- 568 Noudoost, B., Chang, M. H., Steinmetz, N. A., Moore, T., Apr. 2010. Top-down control of visual attention. *Curr.*  
569 *Opin. Neurobiol.* 20 (2), 183–190.
- 570 Oberste-Frielinghaus, J., Morales-Gregorio, A., Essink, S., Kleinjohann, A., Grün, S., Ito, J., 2024. Detection and  
571 removal of hyper-synchronous artifacts in massively parallel spike recordings. *BioRxiv*.
- 572 Perin, R., Berger, T. K., Markram, H., Mar. 2011. A synaptic organizing principle for cortical neuronal groups.  
573 *Proc. Natl. Acad. Sci. USA* 108 (13), 5419–5424.
- 574 Perkel, D. H., Bullock, T. H., December 1968. Neural coding. *Neurosci. Res. Program Bull.* 6 (3), 221–348.

- 575 Petersen, S. E., Robinson, D. L., Morris, J. D., 1987. Contributions of the pulvinar to visual spatial attention.  
576 *Neuropsychologia* 25 (1), 97–105.
- 577 Plesser, H. E., Diesmann, M., Feb. 2009. Simplicity and efficiency of integrate-and-fire neuron models. *Neural*  
578 *Comput.* 21, 353–359.
- 579 Potjans, T. C., Diesmann, M., Mar. 2014. The cell-type specific cortical microcircuit: Relating structure and  
580 activity in a full-scale spiking network model. *Cereb. Cortex* 24 (3), 785–806.
- 581 Rajdl, K., Lansky, P., Kostal, L., 2020. Fano factor: A potentially useful information. *Front. Comput. Neurosci.*  
582 14, 569049.
- 583 Robinson, D. L., Goldberg, M. E., Stanton, G. B., 1978. Parietal association cortex in the primate: sensory  
584 mechanisms and behavioral modulations. *J. Neurophysiol.* 41 (4), 910–932, PMID: 98614.
- 585 Rost, T., Deger, M., Nawrot, M. P., 2018. Winnerless competition in clustered balanced networks: inhibitory  
586 assemblies do the trick. *Biol. Cybern.* 112 (1), 81–98.
- 587 Rostami, V., Rost, T., Riehle, A., van Albada, S. J., Nawrot, M. P., 2022. Excitatory and inhibitory motor  
588 cortical clusters account for balance, variability, and task performance. *BioRxiv*.
- 589 Rosvall, M., Axelsson, D., Bergstrom, C. T., 2009. The map equation. *Eur. Phys. J. Spec. Top.* 178 (1), 13–23.
- 590 Sapountzis, P., Paneri, S., Papadopoulos, S., Gregoriou, G. G., 2022. Dynamic and stable population coding of  
591 attentional instructions coexist in the prefrontal cortex. *Proc. Natl. Acad. Sci. USA* 119 (40).
- 592 Schaub, M. T., Billeh\*, Y., Anastassiou, C. A., Koch, C., Barahona, M., 2015. Emergence of slow-switching  
593 assemblies in structured neuronal networks. *PLOS Comput. Biol.* 11 (7), e1004196.
- 594 Schmidt, M., Bakker, R., Hilgetag, C. C., Diesmann, M., van Albada, S. J., Apr. 2018a. Multi-scale account of  
595 the network structure of macaque visual cortex. *Brain Struct. Funct.* 223 (3), 1409–1435.
- 596 Schmidt, M., Bakker, R., Shen, K., Bezgin, G., Diesmann, M., van Albada, S. J., 2018b. A multi-scale layer-  
597 resolved spiking network model of resting-state dynamics in macaque visual cortical areas. *PLOS Comput. Biol.*  
598 14 (10), e1006359.
- 599 Schmolesky, M. T., Wang, Y., Hanes, D. P., Thompson, K. G., Leutgeb, S., Schall, J. D., Leventhal, A. G., 1998.  
600 Signal timing across the macaque visual system. *J. Neurophysiol.* 79, 3272–3278.
- 601 Schroeder, K. E., Irwin, Z. T., Gaidica, M., Bentley, J. N., Patil, P. G., Mashour, G. A., Chestek, C. A., 2016.  
602 Disruption of corticocortical information transfer during ketamine anesthesia in the primate brain. *NeuroImage*  
603 134, 459–465.
- 604 Schuecker, J., Schmidt, M., van Albada, S. J., Diesmann, M., Helias, M., Feb. 2017. Fundamental activity  
605 constraints lead to specific interpretations of the connectome. *PLOS Comput. Biol.* 13 (2), e1005179.
- 606 Shen, K., Bezgin, G., Hutchison, R., Gati, J., Menon, R., Everling, S., McIntosh, R., 2012. Information processing  
607 architecture of functionally defined clusters in the macaque cortex. *J. Neurosci.* 32 (48), 17465–17476.
- 608 Shin, M., Kitazawa, A., Yoshinaga, S., Hayashi, K., Hirata, Y., Dehay, C., Kubo, K.-i., Nakajima, K., 2019.  
609 Both excitatory and inhibitory neurons transiently form clusters at the outermost region of the developing  
610 mammalian cerebral neocortex. *J. Comp. Neurol.* 527 (10), 1577–1597.
- 611 Shinomoto, S., Kim, H., Shimokawa, T., Matsuno, N., Funahashi, S., Shima, K., Fujita, I., Tamura, H., Doi, T.,  
612 Kawano, K., Inaba, N., Fukushima, K., Kurkin, S., Kurata, K., Taira, M., Tsutsui, K.-I., Komatsu, H., Ogawa,  
613 T., Koida, K., Tanji, J., Toyama, K., 2009. Relating neuronal firing patterns to functional differentiation of  
614 cerebral cortex. *PLOS Comput. Biol.* 5 (7), e1000433.



- 615 Shinomoto, S., Shima, K., Tanji, J., Dec. 2003. Differences in spiking patterns among cortical neurons. *Neural*  
616 *Comput.* 15 (12), 2823–2842.
- 617 Shipp, S., 2003. The functional logic of cortico–pulvinar connections. *Philos. Trans. R. Soc. B* 358 (1438),  
618 1605–1624.
- 619 Song, S., Sjöström, P., Reigl, M., Nelson, S., Chklovskii, D., 2005. Highly nonrandom features of synaptic  
620 connectivity in local cortical circuits. *PLOS Biol.* 3 (3), e68.
- 621 Thompson, K. G., Hanes, D. P., Bichot, N. P., Schall, J. D., 1996. Perceptual and motor processing stages  
622 identified in the activity of macaque frontal eye field neurons during visual search. *J. Neurophysiol.* 76 (6),  
623 4040–4055, PMID: 8985899.
- 624 Thörnig, P., von St. Vieth, B., 2021. JURECA: Data Centric and Booster Modules implementing the Modular  
625 Supercomputing Architecture at Jülich Supercomputing Centre. *JLSRF* 7, A182.
- 626 van Albada, S. J., Helias, M., Diesmann, M., 2015. Scalability of asynchronous networks is limited by one-to-one  
627 mapping between effective connectivity and correlations. *PLOS Comput. Biol.* 11 (9), e1004490.
- 628 van Albada, S. J., Morales-Gregorio, A., Dickscheid, T., Goulas, A., Bakker, R., Bludau, S., Palm, G., Hilgetag,  
629 C.-C., Diesmann, M., 2022. Bringing anatomical information into neuronal network models. In: Giugliano,  
630 M., Negrello, M., Linaro, D. (Eds.), *Computational Modelling of the Brain: Modelling Approaches to Cells,*  
631 *Circuits and Networks.* Springer International Publishing, Cham, pp. 201–234.
- 632 Van Essen, D. C., Drury, H. A., Dickson, J., Harwell, J., Hanlon, D., Anderson, C. H., 2001. An integrated  
633 software suite for surface-based analyses of cerebral cortex. *J. Am. Med. Inf. Assoc.* 8 (5), 443–459.
- 634 Virtanen, P., Gommers, R., Oliphant, T. E., Haberland, M., Reddy, T., Cournapeau, D., Burovski, E., Peterson,  
635 P., Weckesser, W., Bright, J., van der Walt, S. J., Brett, M., Wilson, J., Millman, K. J., Mayorov, N., Nelson,  
636 A. R. J., Jones, E., Kern, R., Larson, E., Carey, C. J., Polat, İ., Feng, Y., Moore, E. W., VanderPlas, J.,  
637 Laxalde, D., Perktold, J., Cimrman, R., Henriksen, I., Quintero, E. A., Harris, C. R., Archibald, A. M., Ribeiro,  
638 A. H., Pedregosa, F., van Mulbregt, P., SciPy 1.0 Contributors, 2020. *SciPy 1.0: Fundamental Algorithms for*  
639 *Scientific Computing in Python.* *Nat. Methods* 17, 261–272.
- 640 Wilke, M., Kagan, I., Andersen, R. A., 2013. Effects of pulvinar inactivation on spatial decision-making between  
641 equal and asymmetric reward options. *J. Cogn. Neurosci.* 25 (8), 1270–1283.
- 642 Wilke, M., Turchi, J., Smith, K., Mishkin, M., Leopold, D. A., 2010. Pulvinar inactivation disrupts selection of  
643 movement plans. *J. Neurosci.* 30 (25), 8650–8659.
- 644 Xue, M., Atallah, B. V., Scanziani, M., Jul 2014. Equalizing excitation-inhibition ratios across visual cortical  
645 neurons. *Nature* 511 (7511), 596–600.
- 646 Yassin, L., Benedetti, B. L., Jouhanneau, J.-S., Wen, J. A., Poulet, J. F. A., Barth, A. L., Dec 2010. An embedded  
647 subnetwork of highly active neurons in the neocortex. *Neuron* 68 (6), 1043–1050.
- 648 Yger, P., Spampinato, G. L., Esposito, E., Lefebvre, B., Deny, S., Gardella, C., Stimberg, M., Jetter, F., Zeck, G.,  
649 Picaud, S., Duebel, J., Marre, O., 2018. A spike sorting toolbox for up to thousands of electrodes validated  
650 with ground truth recordings in vitro and in vivo. *eLife* 7, 1–23.
- 651 Yoshimura, Y., Dantzker, J., Callaway, E., 2005. Excitatory cortical neurons form fine-scale functional networks.  
652 *Nature* 433 (24), 868–873.
- 653 Zajzon, B., Mahmoudian, S., Morrison, A., Duarte, R., 2019. Passing the Message: Representation Transfer in  
654 Modular Balanced Networks. *Front. Comput. Neurosci.* 13, 79.

- 655 Zajzon, B., Morales-Gregorio, A., 2019. Trans-thalamic pathways: strong candidates for supporting communication  
656 between functionally distinct cortical areas. *J. Neurosci.* 39 (36), 7034–7036.
- 657 Znamenskiy, P., Kim, M.-H., Muir, D. R., Iacaruso, M. F., Hofer, S. B., Mrsic-Flogel, T. D., 2018. Functional  
658 selectivity and specific connectivity of inhibitory neurons in primary visual cortex. *BioRxiv*.
- 659 Znamenskiy, P., Kim, M.-H., Muir, D. R., Iacaruso, M. F., Hofer, S. B., Mrsic-Flogel, T. D., 2024. Functional  
660 specificity of recurrent inhibition in visual cortex. *Neuron*.

## 661 Supplementary materials

### 662 Supplementary methods

#### 663 V1 spiking data from [Chu et al. \(2014b\)](#)

664 The experimental recordings from all layers of V1 have previously been used and described in the context of the  
665 multi-area model in [Schmidt et al. \(2018b\)](#). A detailed description has been published in [Chu et al. \(2014b\)](#), and  
666 the dataset is publicly available ([Chu et al., 2014a](#)). In short, the data were collected from a 64-electrode array  
667 implanted into primary visual area V1 of a lightly anesthetized macaque monkey, and are spike-sorted into 140  
668 single units. In our analysis in [Fig. S1](#), we used the data on 15 minutes of spontaneous activity during which no  
669 visual stimulation was provided.

#### 670 Macaque resting-state fMRI

671 The fMRI data have previously been used and described in the context of the multi-area model in [Schmidt et al.](#)  
672 [\(2018b\)](#). The data are publicly available in processed form in the GitHub repository of the model<sup>2</sup>. The data  
673 were acquired from six male macaque monkeys, and five of the six subjects have previously been described in  
674 [Babapoor-Farrokhran et al. \(2013\)](#). The Animal Use Subcommittee of the University of Western Ontario Council  
675 on Animal Care approved all experimental protocols in accordance with the guidelines of the Canadian Council on  
676 Animal Care. The subjects were under light anesthesia, and ten sets of five-minute resting-state fMRI scans were  
677 acquired from each subject. The AFNI software package<sup>3</sup> was used to regress out nuisance variables. The Pearson  
678 correlation coefficients of the probabilistically weighted ROI time series for each scan were used to compute the  
679 functional connectivity ([Shen et al., 2012](#)).

#### 680 Power spectral density comparison

681 For the comparison with the V1 data in [Fig. S1](#), the power spectral density (PSD) is computed using Welch's  
682 method implemented in `signal.welch` in the Python SciPy library ([Virtanen et al., 2020](#)). A boxcar window, a  
683 segment length of 1024 data points, and 1000 overlapping points between segments are used.

#### 684 Functional connectivity comparison with fMRI

685 For the analysis of the functional connectivity (FC) in [Fig. S1](#), we define the FC of the spiking network model as  
686 the zero-time-lag cross-correlation of the area-averaged synaptic inputs, following [Schmidt et al. \(2018b\)](#). It is  
687 approximated by

$$I_A(t) = \frac{1}{N_A} \sum_{i \in A} N_i |I_i(t)| = \frac{1}{N_A} \sum_{i \in A} N_i \sum_j K_{ij} |J_{ij}| (\nu_j * PSC_j)(t).$$

688 The term  $PSC_j(t) = \exp[-t/\tau_s]$  is the normalized postsynaptic current,  $*$  means convolution,  $\tau_s$  is the synaptic  
689 time constant,  $\nu_j$  is the population firing rate of the source population  $j$ ,  $K_{ij}$  is the mean indegree, and  $J_{ij}$  is the  
690 mean synaptic weight of the connection from  $j$  to the target population  $i$  containing  $N$  neurons. The population  
691 firing rate  $\nu_j$  is a spike histogram with bin width 1 ms averaged over the entire population. Hence, time  $t$  here  
692 has a resolution of 1 ms.

---

<sup>2</sup><https://github.com/inm-6/multi-area-model>

<sup>3</sup>[afni.nimh.nih.gov/afni](https://afni.nimh.nih.gov/afni)

## 693 Supplementary results

### 694 Comparison with Schmidt et al. (2018b)

695 To understand the main differences between the original and clustered model, we first compare the simulation results  
696 against the experimental data used by Schmidt et al. (2018b). The experimental data consist of multielectrode  
697 spike recordings from macaque V1 (Chu et al., 2014b,a) and resting-state fMRI recordings (Babapoor-Farrokhran  
698 et al., 2013); see Experimental data for a detailed description of the data. Fig. S1 shows that the explanatory  
699 power of the model is conserved. Fig. S1A–C show raster plots of the original model, the clustered model, and the  
700 experimental recordings of (Chu et al., 2014a). The CV ISI, shown in Fig. S1D, and the LvR, shown in Fig. S1E,  
701 in area V1 appear slightly better in the clustered model than in the original model.

702 We quantify the similarity between the distributions using a Kolmogorov-Smirnov test of each model against  
703 the experimental data distribution. The CV ISI distribution of the V1 activity in the clustered model appears  
704 more similar to the experimental data (KS = 0.53,  $p \ll 0.001$ ) than the original model (KS = 0.73,  $p \ll 0.001$ ).  
705 Likewise, the LvR distribution is also better captured by the clustered model (KS = 0.59,  $p \ll 0.001$ ) than by  
706 the original model (KS = 0.64,  $p \ll 0.001$ ). However, the firing rate distribution from the original model better  
707 matches the experimental data (KS = 0.09,  $p = 0.28$ ) than the clustered model (KS = 0.26,  $p \ll 0.001$ ), shown in  
708 Fig. S1F. We also compare the power spectral density (PSD) of the spike histograms (bin size of 1 ms). The  
709 original model matches the experimental power spectrum well, whereas the clustered model exhibits an almost  
710 flat power spectrum that does not follow the experimental findings.

711 Finally, we compare the cortico-cortical interactions of the model with experimentally measured fMRI BOLD  
712 signals (Babapoor-Farrokhran et al., 2013). Fig. S1H shows the Pearson correlation coefficient  $r$  of simulated  
713 functional connectivity (FC) with experimentally measured FC for different numbers of clusters  $Q$ . The dashed  
714 line shows the average correlation coefficient ( $r = 0.31$ ) across all monkeys in the fMRI dataset, which indicates  
715 the correlation level to be explained by a model that is not tuned to any individual subject. All model versions  
716 reach this level of correlation between simulated and experimental FC.

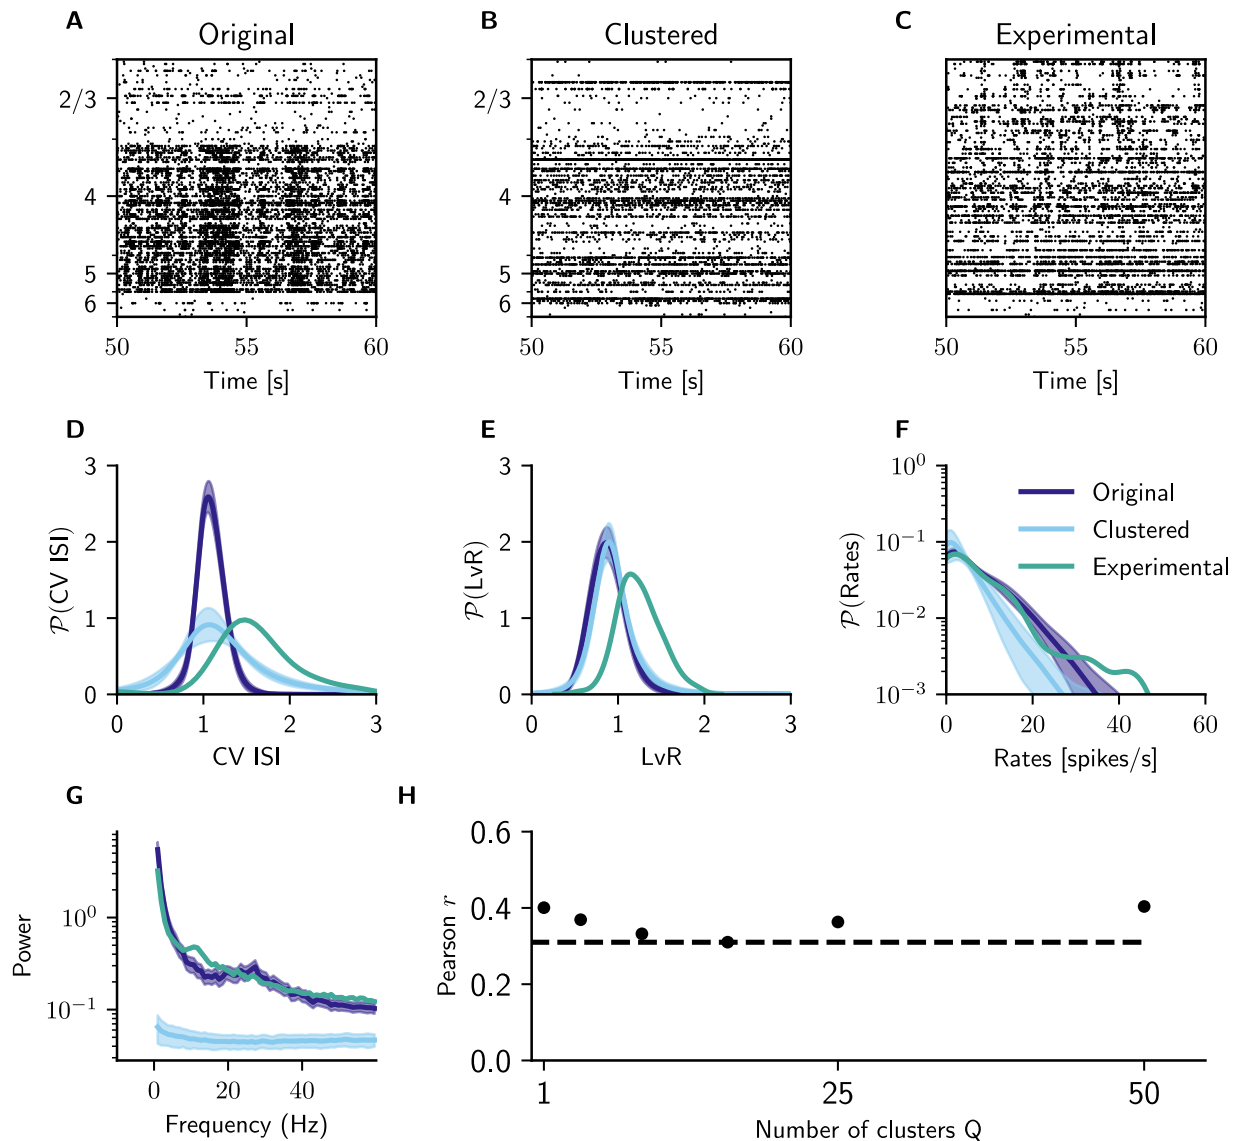

Figure S1: **Comparison with experimental data used in Schmidt et al. (2018b)**. (A-C) Raster plots showing the spiking activity of excitatory and inhibitory cells from the original, unclustered model (A), from the clustered model with 50 clusters (B), and from the experimental data (C); simulated excitatory and inhibitory neurons are shuffled within layers for plotting to better match the sampling from the experimental data, where neurons are ordered depth-wise but no distinction is made between excitatory and inhibitory cells. (D,E) Distribution of irregularity of single-unit spike trains across all populations in area V1 quantified by the coefficient of variation of the interspike intervals  $CV\ ISI$  (D) and revised local variation  $LvR$  (E) (Shinomoto et al., 2009) for different numbers of clusters  $Q$  compared against experimental data (Chu et al., 2014a). (F) Distribution of simulated spike rates across all populations of V1 and for the 140 single units extracted from the experimental data (Chu et al., 2014a). (G) Power spectra of the summed spiking activity of 140 randomly selected V1 neurons for the two model versions and for the experimental data. (H) Pearson correlation coefficient  $r$  of simulated functional connectivity FC vs. experimentally measured FC for different numbers of clusters.  $Q = 1$  refers to the original, unclustered model. Dashed line: average correlation across all monkeys.
